# Supplementary material for: Prediction of the Linear and Nonlinear Optical Properties of a Schiff Base Derivatives via DFT
Source: Hindawi journal article supplement (doi:10.1155/2019/8148392), 2019-04-01
Supplement: f1 [file 8148392.f1.docx]

*Supplementary Materials*

**Prediction of the linear and nonlinear optical properties of a Schiff base derivatives via DFT**

# Clodoaldo Valverde,1,2 Ítalo Nuta Ribeiro,1 João Victor B. Soares,1 Basílio Baseia,3,4 and Francisco A. P. Osório 4,5

*1 Laboratório de Modelagem Molecular Aplicada e Simulação (LaMMAS), Campus de Ciências Exatas e Tecnológicas, Universidade Estadual de Goiás, 75001-970, Anápolis, GO, Brazil.*

*2 Universidade Paulista, 74845-090, Goiânia, GO, Brazil.*

*3 Departamento de Física, Universidade Federal da Paraíba, 58.051-970, João Pessoa, PB, Brazil.*

*4 Instituto de Física, Universidade Federal de Goiás, 74.690-900, Goiânia, GO, Brazil*

*5 Escola de Ciências Exatas e da Computação, Pontifícia Universidade Católica de Goiás, 74605-220, Goiânia, GO, Brazil.*

Correspondence should be addressed to Clodoaldo Valverde; [valverde@ueg.br](mailto:valverde@ueg.br)

LIST OF TABLES

[Table S 1. DFT-B3LYP/6-311+G(d) optimized in Gas Phase 4](#_Toc1397689)

[Table S 2 . DFT-B3LYP/6-311+G(d) optimized in Argon 5](#_Toc1397690)

[Table S 3. DFT-B3LYP/6-311+G(d) optimized in Heptane. 6](#_Toc1397691)

[Table S 4. DFT-B3LYP/6-311+G(d) optimized in Toluene. 7](#_Toc1397692)

[Table S 5. DFT-B3LYP/6-311+G(d) optimized in Chloroform. 8](#_Toc1397693)

[Table S 6. DFT-B3LYP/6-311+G(d) optimized in ChloroBenzene. 9](#_Toc1397694)

[Table S 7. DFT-B3LYP/6-311+G(d) optimized in TetrahydroFuran. 10](#_Toc1397695)

[Table S 8. DFT-B3LYP/6-311+G(d) optimized in DichloroMethane. 11](#_Toc1397696)

[Table S 9. DFT-B3LYP/6-311+G(d) optimized in DichloroEthane 12](#_Toc1397697)

[Table S 10. DFT-B3LYP/6-311+G(d) optimized in 2-Methyl-2-Propanol. 13](#_Toc1397698)

[Table S 11. DFT-B3LYP/6-311+G(d) optimized in 1-Butanol. 14](#_Toc1397699)

[Table S 12. DFT-B3LYP/6-311+G(d) optimized in Acetone. 15](#_Toc1397700)

[Table S 13. DFT-B3LYP/6-311+G(d) optimized in Ethanol. 16](#_Toc1397701)

[Table S 14. DFT-B3LYP/6-311+G(d) optimized in Methanol. 18](#_Toc1397702)

[Table S 15. DFT-B3LYP/6-311+G(d) optimized in Acetonitrile. 19](#_Toc1397703)

[Table S 16. DFT-B3LYP/6-311+G(d) optimized in DMSO. 20](#_Toc1397704)

[Table S 17. DFT-B3LYP/6-311+G(d) optimized in FormicAcid. 21](#_Toc1397705)

[Table S 18. DFT-B3LYP/6-311+G(d) optimized in Water. 22](#_Toc1397706)

[Table S 19. DFT-B3LYP/6-311+G(d) optimized in Formamide. 23](#_Toc1397707)

[Table S 20. DFT-B3LYP/6-311+G(d) optimized in n-MethylFormamida-mixture. 24](#_Toc1397708)

[Table S 21. CAM-B3LYP/6-311+G(d) charges 26](#_Toc1397709)

[Table S 22. DFT-B3LYP/6-311+G(d) calculed 27](#_Toc1397710)

[Table S 23. CAM-B3LYP/6-311+G(d) calculate 28](#_Toc1397711)

LIST OF FIGURES

[Figure S 1. HOMO and LUMO in argon. 29](#_Toc1399576)

[Figure S 2. HOMO and LUMO in heptane. 29](#_Toc1399577)

[Figure S 3. HOMO and LUMO in toluene. 30](#_Toc1399578)

[Figure S 4. HOMO and LUMO in chloroform. 30](#_Toc1399579)

[Figure S 5. HOMO and LUMO in chlorobenzene. 31](#_Toc1399580)

[Figure S 6. HOMO and LUMO in tetrahydrofuran. 31](#_Toc1399581)

[Figure S 7. HOMO and LUMO in dichloromethane. 32](#_Toc1399582)

[Figure S 8. HOMO and LUMO in dichloroethane. 32](#_Toc1399583)

[Figure S 9. HOMO and LUMO in 2-methyl-2-propanol. 33](#_Toc1399584)

[Figure S 10. HOMO and LUMO in 1-butanol. 33](#_Toc1399585)

[Figure S 11. HOMO and LUMO in acetone. 34](#_Toc1399586)

[Figure S 12. HOMO and LUMO in etanol. 34](#_Toc1399587)

[Figure S 13. HOMO and LUMO in metanol. 35](#_Toc1399588)

[Figure S 14. HOMO and LUMO in Acetonitrile. 35](#_Toc1399589)

[Figure S 15. HOMO and LUMO in dmso. 36](#_Toc1399590)

[Figure S 16. HOMO and LUMO in formicacid. 36](#_Toc1399591)

[Figure S 17. HOMO and LUMO in water. 37](#_Toc1399592)

[Figure S 18. HOMO and LUMO in formamide. 37](#_Toc1399593)

Table S 1. DFT-B3LYP/6-311+G(d) optimized in Gas Phase

|  | Coordinates | | |
| --- | --- | --- | --- |
|  | x | y | z |
| O1 | 8.625 | 0.286 | 0.364 |
| N2 | -3.325 | 0.613 | -0.072 |
| N1 | 2.289 | 0.331 | 0.127 |
| H1A | 2.745 | 1.229 | 0.057 |
| N3 | -6.261 | -1.367 | 0.349 |
| C6 | 6.748 | -0.032 | -1.140 |
| H6 | 7.374 | 0.128 | -2.016 |
| C1 | 7.300 | 0.030 | 0.138 |
| C2 | 6.489 | -0.177 | 1.257 |
| H2 | 6.934 | -0.131 | 2.244 |
| C3 | 5.137 | -0.444 | 1.086 |
| H3 | 4.513 | -0.604 | 1.960 |
| C4 | 4.562 | -0.510 | -0.190 |
| C5 | 5.388 | -0.299 | -1.295 |
| H5 | 4.970 | -0.344 | -2.296 |
| C8 | 0.906 | 0.359 | 0.038 |
| C7 | 3.088 | -0.790 | -0.359 |
| H7A | 2.870 | -1.010 | -1.415 |
| H7B | 2.812 | -1.684 | 0.211 |
| C13 | 0.146 | -0.782 | -0.278 |
| H13 | 0.637 | -1.719 | -0.516 |
| C12 | -1.243 | -0.726 | -0.310 |
| H12 | -1.792 | -1.620 | -0.585 |
| C11 | -1.931 | 0.467 | -0.043 |
| C10 | -1.166 | 1.615 | 0.225 |
| H10 | -1.687 | 2.550 | 0.403 |
| C9 | 0.215 | 1.563 | 0.283 |
| H9 | 0.778 | 2.462 | 0.517 |
| C14 | -4.105 | -0.372 | 0.157 |
| H14 | -3.756 | -1.371 | 0.441 |
| C15 | -5.570 | -0.245 | 0.080 |
| C16 | -6.196 | 0.966 | -0.250 |
| H16 | -5.585 | 1.836 | -0.458 |
| C17 | -7.581 | 1.009 | -0.298 |
| H17 | -8.095 | 1.932 | -0.548 |
| C18 | -8.302 | -0.153 | -0.019 |
| H18 | -9.386 | -0.165 | -0.046 |
| C19 | -7.592 | -1.309 | 0.296 |
| H19 | -8.118 | -2.235 | 0.519 |
| H1 | 9.092 | 0.402 | -0.472 |

Table S 2 . DFT-B3LYP/6-311+G(d) optimized in Argon

|  | Coordinates | | |
| --- | --- | --- | --- |
|  | x | y | z |
| O1 | 8.627 | 0.285 | 0.357 |
| N2 | -3.325 | 0.614 | -0.062 |
| N1 | 2.289 | 0.330 | 0.130 |
| H1A | 2.746 | 1.228 | 0.070 |
| N3 | -6.263 | -1.373 | 0.322 |
| C6 | 6.742 | -0.001 | -1.143 |
| H6 | 7.361 | 0.182 | -2.017 |
| C1 | 7.301 | 0.030 | 0.134 |
| C2 | 6.498 | -0.207 | 1.252 |
| H2 | 6.947 | -0.184 | 2.238 |
| C3 | 5.145 | -0.474 | 1.083 |
| H3 | 4.528 | -0.659 | 1.957 |
| C4 | 4.563 | -0.511 | -0.191 |
| C5 | 5.381 | -0.269 | -1.295 |
| H5 | 4.958 | -0.292 | -2.295 |
| C8 | 0.908 | 0.358 | 0.043 |
| C7 | 3.088 | -0.790 | -0.359 |
| H7A | 2.869 | -1.007 | -1.415 |
| H7B | 2.814 | -1.686 | 0.209 |
| C13 | 0.147 | -0.782 | -0.277 |
| H13 | 0.638 | -1.717 | -0.518 |
| C12 | -1.242 | -0.726 | -0.307 |
| H12 | -1.791 | -1.619 | -0.586 |
| C11 | -1.930 | 0.466 | -0.035 |
| C10 | -1.165 | 1.613 | 0.238 |
| H10 | -1.685 | 2.548 | 0.421 |
| C9 | 0.216 | 1.562 | 0.294 |
| H9 | 0.780 | 2.460 | 0.530 |
| C14 | -4.107 | -0.375 | 0.149 |
| H14 | -3.757 | -1.379 | 0.414 |
| C15 | -5.571 | -0.245 | 0.075 |
| C16 | -6.197 | 0.972 | -0.231 |
| H16 | -5.588 | 1.847 | -0.422 |
| C17 | -7.583 | 1.016 | -0.278 |
| H17 | -8.097 | 1.944 | -0.510 |
| C18 | -8.304 | -0.151 | -0.022 |
| H18 | -9.388 | -0.162 | -0.049 |
| C19 | -7.595 | -1.314 | 0.270 |
| H19 | -8.121 | -2.243 | 0.474 |
| H1 | 9.090 | 0.422 | -0.479 |

Table S 3. DFT-B3LYP/6-311+G(d) optimized in Heptane.

|  | Coordinates | | |
| --- | --- | --- | --- |
|  | x | y | z |
| O1 | 8.628 | 0.282 | 0.360 |
| N2 | -3.325 | 0.615 | -0.057 |
| N1 | 2.290 | 0.331 | 0.128 |
| H1A | 2.747 | 1.229 | 0.074 |
| N3 | -6.263 | -1.377 | 0.305 |
| C6 | 6.741 | 0.017 | -1.141 |
| H6 | 7.358 | 0.215 | -2.013 |
| C1 | 7.302 | 0.029 | 0.136 |
| C2 | 6.500 | -0.227 | 1.251 |
| H2 | 6.951 | -0.220 | 2.237 |
| C3 | 5.148 | -0.493 | 1.081 |
| H3 | 4.533 | -0.693 | 1.953 |
| C4 | 4.564 | -0.511 | -0.194 |
| C5 | 5.380 | -0.250 | -1.295 |
| H5 | 4.955 | -0.258 | -2.295 |
| C8 | 0.909 | 0.360 | 0.042 |
| C7 | 3.089 | -0.789 | -0.364 |
| H7A | 2.871 | -1.001 | -1.420 |
| H7B | 2.813 | -1.686 | 0.201 |
| C13 | 0.147 | -0.780 | -0.280 |
| H13 | 0.638 | -1.715 | -0.524 |
| C12 | -1.241 | -0.724 | -0.309 |
| H12 | -1.790 | -1.617 | -0.589 |
| C11 | -1.930 | 0.467 | -0.033 |
| C10 | -1.164 | 1.614 | 0.243 |
| H10 | -1.683 | 2.548 | 0.429 |
| C9 | 0.217 | 1.562 | 0.297 |
| H9 | 0.780 | 2.461 | 0.534 |
| C14 | -4.107 | -0.376 | 0.143 |
| H14 | -3.758 | -1.383 | 0.395 |
| C15 | -5.572 | -0.246 | 0.073 |
| C16 | -6.200 | 0.975 | -0.216 |
| H16 | -5.592 | 1.853 | -0.396 |
| C17 | -7.586 | 1.019 | -0.260 |
| H17 | -8.100 | 1.950 | -0.479 |
| C18 | -8.306 | -0.151 | -0.020 |
| H18 | -9.390 | -0.163 | -0.046 |
| C19 | -7.596 | -1.318 | 0.256 |
| H19 | -8.121 | -2.250 | 0.448 |
| H1 | 9.089 | 0.431 | -0.474 |

Table S 4. DFT-B3LYP/6-311+G(d) optimized in Toluene.

|  | Coordinates | | |
| --- | --- | --- | --- |
|  | x | y | z |
| O1 | 8.628 | 0.279 | 0.363 |
| N2 | -3.325 | 0.616 | -0.053 |
| N1 | 2.290 | 0.331 | 0.126 |
| H1A | 2.747 | 1.230 | 0.077 |
| N3 | -6.263 | -1.379 | 0.295 |
| C6 | 6.740 | 0.029 | -1.139 |
| H6 | 7.357 | 0.237 | -2.009 |
| C1 | 7.302 | 0.028 | 0.137 |
| C2 | 6.502 | -0.241 | 1.251 |
| H2 | 6.952 | -0.244 | 2.237 |
| C3 | 5.149 | -0.506 | 1.078 |
| H3 | 4.536 | -0.717 | 1.949 |
| C4 | 4.564 | -0.510 | -0.196 |
| C5 | 5.380 | -0.237 | -1.295 |
| H5 | 4.954 | -0.235 | -2.294 |
| C8 | 0.909 | 0.361 | 0.041 |
| C7 | 3.089 | -0.787 | -0.368 |
| H7A | 2.872 | -0.996 | -1.425 |
| H7B | 2.813 | -1.686 | 0.194 |
| C13 | 0.147 | -0.779 | -0.283 |
| H13 | 0.638 | -1.713 | -0.529 |
| C12 | -1.241 | -0.723 | -0.310 |
| H12 | -1.789 | -1.616 | -0.592 |
| C11 | -1.930 | 0.467 | -0.031 |
| C10 | -1.164 | 1.614 | 0.246 |
| H10 | -1.683 | 2.547 | 0.436 |
| C9 | 0.217 | 1.563 | 0.299 |
| H9 | 0.781 | 2.461 | 0.537 |
| C14 | -4.108 | -0.377 | 0.139 |
| H14 | -3.758 | -1.386 | 0.382 |
| C15 | -5.572 | -0.246 | 0.071 |
| C16 | -6.201 | 0.977 | -0.206 |
| H16 | -5.595 | 1.857 | -0.380 |
| C17 | -7.587 | 1.021 | -0.249 |
| H17 | -8.102 | 1.953 | -0.459 |
| C18 | -8.307 | -0.152 | -0.018 |
| H18 | -9.391 | -0.164 | -0.043 |
| C19 | -7.596 | -1.320 | 0.248 |
| H19 | -8.121 | -2.254 | 0.432 |
| H1 | 9.089 | 0.439 | -0.470 |

Table S 5. DFT-B3LYP/6-311+G(d) optimized in Chloroform.

|  | Coordinates | | |
| --- | --- | --- | --- |
|  | x | y | z |
| O1 | 8.629 | 0.253 | 0.362 |
| N2 | -3.323 | 0.622 | 0.012 |
| N1 | 2.290 | 0.294 | 0.191 |
| H1A | 2.751 | 1.190 | 0.255 |
| N3 | -6.266 | -1.392 | 0.177 |
| C6 | 6.699 | 0.295 | -1.109 |
| H6 | 7.286 | 0.703 | -1.927 |
| C1 | 7.301 | 0.024 | 0.121 |
| C2 | 6.541 | -0.505 | 1.167 |
| H2 | 7.021 | -0.716 | 2.116 |
| C3 | 5.188 | -0.759 | 0.975 |
| H3 | 4.607 | -1.173 | 1.794 |
| C4 | 4.564 | -0.495 | -0.251 |
| C5 | 5.340 | 0.035 | -1.284 |
| H5 | 4.884 | 0.246 | -2.247 |
| C8 | 0.912 | 0.339 | 0.102 |
| C7 | 3.089 | -0.757 | -0.441 |
| H7A | 2.859 | -0.835 | -1.513 |
| H7B | 2.824 | -1.718 | 0.011 |
| C13 | 0.146 | -0.760 | -0.337 |
| H13 | 0.633 | -1.667 | -0.671 |
| C12 | -1.242 | -0.695 | -0.365 |
| H12 | -1.792 | -1.553 | -0.735 |
| C11 | -1.928 | 0.466 | 0.028 |
| C10 | -1.158 | 1.576 | 0.421 |
| H10 | -1.672 | 2.490 | 0.700 |
| C9 | 0.223 | 1.514 | 0.475 |
| H9 | 0.789 | 2.381 | 0.803 |
| C14 | -4.109 | -0.382 | 0.107 |
| H14 | -3.760 | -1.410 | 0.259 |
| C15 | -5.573 | -0.244 | 0.043 |
| C16 | -6.201 | 0.996 | -0.142 |
| H16 | -5.597 | 1.888 | -0.246 |
| C17 | -7.588 | 1.044 | -0.186 |
| H17 | -8.101 | 1.989 | -0.327 |
| C18 | -8.308 | -0.143 | -0.048 |
| H18 | -9.392 | -0.153 | -0.077 |
| C19 | -7.599 | -1.329 | 0.130 |
| H19 | -8.126 | -2.273 | 0.241 |
| H1 | 9.060 | 0.609 | -0.425 |

Table S 6. DFT-B3LYP/6-311+G(d) optimized in ChloroBenzene.

|  | Coordinates | | |
| --- | --- | --- | --- |
|  | x | y | z |
| O1 | 1.348 | 4.608 | -7.098 |
| N2 | 1.612 | 7.079 | 4.604 |
| N1 | 1.415 | 5.792 | -0.869 |
| H1A | 1.911 | 6.444 | -1.460 |
| N3 | 0.819 | 5.776 | 7.832 |
| C6 | 0.167 | 5.717 | -5.292 |
| H6 | -0.344 | 6.381 | -5.984 |
| C1 | 1.064 | 4.761 | -5.768 |
| C2 | 1.713 | 3.907 | -4.872 |
| H2 | 2.405 | 3.164 | -5.254 |
| C3 | 1.460 | 4.017 | -3.510 |
| H3 | 1.968 | 3.347 | -2.822 |
| C4 | 0.562 | 4.970 | -3.010 |
| C5 | -0.076 | 5.814 | -3.921 |
| H5 | -0.779 | 6.560 | -3.563 |
| C8 | 1.407 | 6.101 | 0.478 |
| C7 | 0.311 | 5.092 | -1.526 |
| H7A | -0.643 | 5.610 | -1.352 |
| H7B | 0.216 | 4.095 | -1.085 |
| C13 | 0.494 | 5.520 | 1.382 |
| H13 | -0.272 | 4.842 | 1.025 |
| C12 | 0.549 | 5.816 | 2.739 |
| H12 | -0.189 | 5.368 | 3.395 |
| C11 | 1.500 | 6.711 | 3.254 |
| C10 | 2.379 | 7.324 | 2.342 |
| H10 | 3.101 | 8.040 | 2.720 |
| C9 | 2.348 | 7.018 | 0.993 |
| H9 | 3.053 | 7.494 | 0.317 |
| C14 | 1.205 | 6.311 | 5.543 |
| H14 | 0.797 | 5.310 | 5.369 |
| C15 | 1.270 | 6.700 | 6.961 |
| C16 | 1.767 | 7.944 | 7.376 |
| H16 | 2.115 | 8.652 | 6.634 |
| C17 | 1.799 | 8.234 | 8.733 |
| H17 | 2.179 | 9.188 | 9.083 |
| C18 | 1.333 | 7.279 | 9.637 |
| H18 | 1.338 | 7.463 | 10.706 |
| C19 | 0.854 | 6.071 | 9.134 |
| H19 | 0.483 | 5.304 | 9.808 |
| H1 | 0.843 | 5.239 | -7.627 |

Table S 7. DFT-B3LYP/6-311+G(d) optimized in TetrahydroFuran.

|  | Coordinates | | |
| --- | --- | --- | --- |
|  | x | y | z |
| O1 | 8.628 | 0.247 | 0.378 |
| N2 | -3.322 | 0.622 | 0.017 |
| N1 | 2.291 | 0.295 | 0.184 |
| H1A | 2.751 | 1.191 | 0.255 |
| N3 | -6.265 | -1.394 | 0.163 |
| C6 | 6.700 | 0.321 | -1.094 |
| H6 | 7.288 | 0.750 | -1.901 |
| C1 | 7.300 | 0.022 | 0.129 |
| C2 | 6.540 | -0.535 | 1.161 |
| H2 | 7.018 | -0.769 | 2.105 |
| C3 | 5.188 | -0.786 | 0.961 |
| H3 | 4.606 | -1.222 | 1.768 |
| C4 | 4.565 | -0.493 | -0.260 |
| C5 | 5.342 | 0.063 | -1.278 |
| H5 | 4.887 | 0.297 | -2.236 |
| C8 | 0.913 | 0.340 | 0.097 |
| C7 | 3.090 | -0.751 | -0.457 |
| H7A | 2.863 | -0.817 | -1.530 |
| H7B | 2.822 | -1.716 | -0.015 |
| C13 | 0.146 | -0.756 | -0.348 |
| H13 | 0.633 | -1.661 | -0.690 |
| C12 | -1.242 | -0.691 | -0.373 |
| H12 | -1.792 | -1.548 | -0.748 |
| C11 | -1.927 | 0.467 | 0.028 |
| C10 | -1.157 | 1.574 | 0.428 |
| H10 | -1.670 | 2.486 | 0.714 |
| C9 | 0.224 | 1.512 | 0.479 |
| H9 | 0.790 | 2.378 | 0.810 |
| C14 | -4.109 | -0.383 | 0.100 |
| H14 | -3.760 | -1.413 | 0.236 |
| C15 | -5.573 | -0.245 | 0.042 |
| C16 | -6.203 | 0.997 | -0.126 |
| H16 | -5.601 | 1.891 | -0.221 |
| C17 | -7.590 | 1.044 | -0.166 |
| H17 | -8.104 | 1.991 | -0.294 |
| C18 | -8.310 | -0.144 | -0.040 |
| H18 | -9.393 | -0.154 | -0.067 |
| C19 | -7.599 | -1.332 | 0.121 |
| H19 | -8.125 | -2.278 | 0.222 |
| H1 | 9.059 | 0.625 | -0.398 |

Table S 8. DFT-B3LYP/6-311+G(d) optimized in DichloroMethane.

|  | Coordinates | | |
| --- | --- | --- | --- |
|  | x | y | z |
| O1 | 8.627 | 0.245 | 0.383 |
| N2 | -3.322 | 0.622 | 0.019 |
| N1 | 2.291 | 0.295 | 0.182 |
| H1A | 2.751 | 1.191 | 0.255 |
| N3 | -6.265 | -1.395 | 0.158 |
| C6 | 6.700 | 0.331 | -1.089 |
| H6 | 7.287 | 0.768 | -1.892 |
| C1 | 7.300 | 0.021 | 0.132 |
| C2 | 6.540 | -0.546 | 1.158 |
| H2 | 7.018 | -0.789 | 2.101 |
| C3 | 5.188 | -0.797 | 0.955 |
| H3 | 4.607 | -1.241 | 1.758 |
| C4 | 4.565 | -0.493 | -0.262 |
| C5 | 5.342 | 0.074 | -1.276 |
| H5 | 4.887 | 0.316 | -2.231 |
| C8 | 0.913 | 0.340 | 0.096 |
| C7 | 3.090 | -0.749 | -0.462 |
| H7A | 2.864 | -0.811 | -1.535 |
| H7B | 2.822 | -1.716 | -0.024 |
| C13 | 0.146 | -0.755 | -0.352 |
| H13 | 0.633 | -1.659 | -0.696 |
| C12 | -1.242 | -0.690 | -0.376 |
| H12 | -1.791 | -1.547 | -0.752 |
| C11 | -1.927 | 0.466 | 0.029 |
| C10 | -1.157 | 1.573 | 0.430 |
| H10 | -1.670 | 2.485 | 0.719 |
| C9 | 0.224 | 1.512 | 0.480 |
| H9 | 0.791 | 2.377 | 0.813 |
| C14 | -4.109 | -0.384 | 0.098 |
| H14 | -3.760 | -1.414 | 0.228 |
| C15 | -5.573 | -0.245 | 0.041 |
| C16 | -6.204 | 0.997 | -0.121 |
| H16 | -5.602 | 1.893 | -0.212 |
| C17 | -7.591 | 1.045 | -0.159 |
| H17 | -8.105 | 1.992 | -0.282 |
| C18 | -8.310 | -0.144 | -0.038 |
| H18 | -9.394 | -0.154 | -0.063 |
| C19 | -7.599 | -1.333 | 0.117 |
| H19 | -8.125 | -2.279 | 0.214 |
| H1 | 9.058 | 0.633 | -0.389 |

Table S 9. DFT-B3LYP/6-311+G(d) optimized in DichloroEthane

|  | Coordinates | | |
| --- | --- | --- | --- |
|  | x | y | z |
| O1 | 8.627 | 0.244 | 0.387 |
| N2 | -3.322 | 0.622 | 0.021 |
| N1 | 2.291 | 0.295 | 0.180 |
| H1A | 2.751 | 1.191 | 0.255 |
| N3 | -6.265 | -1.396 | 0.155 |
| C6 | 6.700 | 0.338 | -1.086 |
| H6 | 7.287 | 0.780 | -1.886 |
| C1 | 7.300 | 0.021 | 0.134 |
| C2 | 6.540 | -0.554 | 1.156 |
| H2 | 7.018 | -0.802 | 2.097 |
| C3 | 5.188 | -0.804 | 0.952 |
| H3 | 4.607 | -1.254 | 1.751 |
| C4 | 4.565 | -0.492 | -0.264 |
| C5 | 5.342 | 0.081 | -1.274 |
| H5 | 4.887 | 0.329 | -2.228 |
| C8 | 0.913 | 0.341 | 0.095 |
| C7 | 3.091 | -0.748 | -0.465 |
| H7A | 2.865 | -0.807 | -1.539 |
| H7B | 2.822 | -1.716 | -0.030 |
| C13 | 0.147 | -0.754 | -0.355 |
| H13 | 0.634 | -1.658 | -0.700 |
| C12 | -1.242 | -0.690 | -0.378 |
| H12 | -1.791 | -1.545 | -0.756 |
| C11 | -1.927 | 0.466 | 0.029 |
| C10 | -1.156 | 1.572 | 0.432 |
| H10 | -1.669 | 2.483 | 0.723 |
| C9 | 0.225 | 1.511 | 0.481 |
| H9 | 0.791 | 2.376 | 0.815 |
| C14 | -4.109 | -0.384 | 0.096 |
| H14 | -3.760 | -1.414 | 0.222 |
| C15 | -5.574 | -0.245 | 0.041 |
| C16 | -6.204 | 0.998 | -0.117 |
| H16 | -5.602 | 1.893 | -0.207 |
| C17 | -7.591 | 1.045 | -0.154 |
| H17 | -8.105 | 1.993 | -0.275 |
| C18 | -8.310 | -0.144 | -0.036 |
| H18 | -9.394 | -0.154 | -0.061 |
| C19 | -7.599 | -1.333 | 0.115 |
| H19 | -8.125 | -2.279 | 0.209 |
| H1 | 9.058 | 0.638 | -0.383 |

Table S 10. DFT-B3LYP/6-311+G(d) optimized in 2-Methyl-2-Propanol.

|  | Coordinates | | |
| --- | --- | --- | --- |
|  | x | y | z |
| O1 | 8.626 | 0.240 | 0.394 |
| N2 | -3.322 | 0.622 | 0.022 |
| N1 | 2.292 | 0.296 | 0.178 |
| H1A | 2.751 | 1.193 | 0.253 |
| N3 | -6.265 | -1.397 | 0.152 |
| C6 | 6.702 | 0.345 | -1.080 |
| H6 | 7.290 | 0.792 | -1.876 |
| C1 | 7.300 | 0.018 | 0.137 |
| C2 | 6.538 | -0.564 | 1.154 |
| H2 | 7.015 | -0.819 | 2.095 |
| C3 | 5.186 | -0.812 | 0.947 |
| H3 | 4.604 | -1.267 | 1.742 |
| C4 | 4.566 | -0.491 | -0.268 |
| C5 | 5.344 | 0.089 | -1.272 |
| H5 | 4.890 | 0.345 | -2.225 |
| C8 | 0.914 | 0.342 | 0.092 |
| C7 | 3.091 | -0.744 | -0.473 |
| H7A | 2.867 | -0.797 | -1.547 |
| H7B | 2.820 | -1.713 | -0.043 |
| C13 | 0.147 | -0.752 | -0.359 |
| H13 | 0.634 | -1.655 | -0.707 |
| C12 | -1.241 | -0.688 | -0.381 |
| H12 | -1.791 | -1.543 | -0.760 |
| C11 | -1.927 | 0.467 | 0.029 |
| C10 | -1.156 | 1.572 | 0.434 |
| H10 | -1.669 | 2.483 | 0.727 |
| C9 | 0.225 | 1.512 | 0.482 |
| H9 | 0.791 | 2.376 | 0.817 |
| C14 | -4.109 | -0.384 | 0.094 |
| H14 | -3.759 | -1.415 | 0.217 |
| C15 | -5.574 | -0.245 | 0.041 |
| C16 | -6.205 | 0.997 | -0.113 |
| H16 | -5.604 | 1.894 | -0.200 |
| C17 | -7.592 | 1.044 | -0.149 |
| H17 | -8.107 | 1.992 | -0.266 |
| C18 | -8.310 | -0.146 | -0.034 |
| H18 | -9.394 | -0.156 | -0.058 |
| C19 | -7.599 | -1.335 | 0.113 |
| H19 | -8.124 | -2.282 | 0.205 |
| H1 | 9.059 | 0.639 | -0.372 |

Table S 11. DFT-B3LYP/6-311+G(d) optimized in 1-Butanol.

|  | Coordinates | | |
| --- | --- | --- | --- |
|  | x | y | z |
| O1 | 8.626 | 0.238 | 0.399 |
| N2 | -3.322 | 0.622 | 0.025 |
| N1 | 2.292 | 0.296 | 0.176 |
| H1A | 2.751 | 1.193 | 0.253 |
| N3 | -6.265 | -1.398 | 0.145 |
| C6 | 6.701 | 0.357 | -1.074 |
| H6 | 7.289 | 0.815 | -1.865 |
| C1 | 7.299 | 0.018 | 0.140 |
| C2 | 6.539 | -0.578 | 1.150 |
| H2 | 7.016 | -0.844 | 2.087 |
| C3 | 5.187 | -0.825 | 0.939 |
| H3 | 4.606 | -1.291 | 1.730 |
| C4 | 4.566 | -0.490 | -0.271 |
| C5 | 5.343 | 0.103 | -1.269 |
| H5 | 4.889 | 0.369 | -2.219 |
| C8 | 0.914 | 0.342 | 0.091 |
| C7 | 3.091 | -0.742 | -0.478 |
| H7A | 2.868 | -0.790 | -1.553 |
| H7B | 2.820 | -1.713 | -0.053 |
| C13 | 0.147 | -0.750 | -0.363 |
| H13 | 0.634 | -1.652 | -0.714 |
| C12 | -1.241 | -0.687 | -0.384 |
| H12 | -1.791 | -1.541 | -0.765 |
| C11 | -1.927 | 0.467 | 0.030 |
| C10 | -1.156 | 1.571 | 0.438 |
| H10 | -1.669 | 2.481 | 0.733 |
| C9 | 0.225 | 1.511 | 0.484 |
| H9 | 0.791 | 2.374 | 0.821 |
| C14 | -4.109 | -0.385 | 0.091 |
| H14 | -3.759 | -1.416 | 0.207 |
| C15 | -5.574 | -0.246 | 0.040 |
| C16 | -6.206 | 0.998 | -0.106 |
| H16 | -5.605 | 1.895 | -0.189 |
| C17 | -7.592 | 1.045 | -0.140 |
| H17 | -8.108 | 1.993 | -0.251 |
| C18 | -8.311 | -0.146 | -0.031 |
| H18 | -9.394 | -0.156 | -0.054 |
| C19 | -7.599 | -1.336 | 0.109 |
| H19 | -8.124 | -2.283 | 0.196 |
| H1 | 9.057 | 0.649 | -0.361 |

Table S 12. DFT-B3LYP/6-311+G(d) optimized in Acetone.

|  | Coordinates | | |
| --- | --- | --- | --- |
|  | x | y | z |
| O1 | 8.625 | 0.237 | 0.401 |
| N2 | -3.322 | 0.622 | 0.026 |
| N1 | 2.292 | 0.297 | 0.175 |
| H1A | 2.751 | 1.193 | 0.253 |
| N3 | -6.265 | -1.398 | 0.143 |
| C6 | 6.701 | 0.362 | -1.071 |
| H6 | 7.288 | 0.824 | -1.860 |
| C1 | 7.299 | 0.017 | 0.141 |
| C2 | 6.539 | -0.583 | 1.148 |
| H2 | 7.016 | -0.854 | 2.084 |
| C3 | 5.187 | -0.830 | 0.936 |
| H3 | 4.607 | -1.301 | 1.724 |
| C4 | 4.566 | -0.490 | -0.272 |
| C5 | 5.343 | 0.108 | -1.267 |
| H5 | 4.889 | 0.379 | -2.216 |
| C8 | 0.914 | 0.342 | 0.091 |
| C7 | 3.091 | -0.741 | -0.481 |
| H7A | 2.868 | -0.786 | -1.555 |
| H7B | 2.820 | -1.712 | -0.057 |
| C13 | 0.147 | -0.750 | -0.365 |
| H13 | 0.634 | -1.651 | -0.717 |
| C12 | -1.241 | -0.686 | -0.386 |
| H12 | -1.790 | -1.540 | -0.768 |
| C11 | -1.927 | 0.467 | 0.030 |
| C10 | -1.156 | 1.571 | 0.439 |
| H10 | -1.669 | 2.480 | 0.736 |
| C9 | 0.225 | 1.510 | 0.485 |
| H9 | 0.791 | 2.374 | 0.823 |
| C14 | -4.109 | -0.385 | 0.090 |
| H14 | -3.759 | -1.416 | 0.203 |
| C15 | -5.574 | -0.246 | 0.040 |
| C16 | -6.206 | 0.998 | -0.103 |
| H16 | -5.605 | 1.895 | -0.185 |
| C17 | -7.593 | 1.045 | -0.137 |
| H17 | -8.108 | 1.994 | -0.246 |
| C18 | -8.311 | -0.146 | -0.030 |
| H18 | -9.395 | -0.157 | -0.052 |
| C19 | -7.599 | -1.336 | 0.107 |
| H19 | -8.124 | -2.283 | 0.192 |
| H1 | 9.057 | 0.652 | -0.357 |

Table S 13. DFT-B3LYP/6-311+G(d) optimized in Ethanol.

|  | Coordinates | | |
| --- | --- | --- | --- |
|  | x | y | z |
| O1 | 8.625 | 0.236 | 0.403 |
| N2 | -3.322 | 0.622 | 0.027 |
| N1 | 2.292 | 0.297 | 0.174 |
| H1A | 2.751 | 1.194 | 0.253 |
| N3 | -6.264 | -1.398 | 0.140 |
| C6 | 6.700 | 0.367 | -1.069 |
| H6 | 7.288 | 0.832 | -1.855 |
| C1 | 7.299 | 0.017 | 0.142 |
| C2 | 6.539 | -0.589 | 1.147 |
| H2 | 7.016 | -0.863 | 2.081 |
| C3 | 5.188 | -0.835 | 0.934 |
| H3 | 4.607 | -1.309 | 1.720 |
| C4 | 4.566 | -0.489 | -0.273 |
| C5 | 5.343 | 0.113 | -1.266 |
| H5 | 4.889 | 0.388 | -2.213 |
| C8 | 0.914 | 0.343 | 0.090 |
| C7 | 3.091 | -0.740 | -0.483 |
| H7A | 2.869 | -0.783 | -1.558 |
| H7B | 2.819 | -1.712 | -0.061 |
| C13 | 0.147 | -0.749 | -0.366 |
| H13 | 0.634 | -1.650 | -0.720 |
| C12 | -1.241 | -0.686 | -0.387 |
| H12 | -1.790 | -1.540 | -0.769 |
| C11 | -1.927 | 0.467 | 0.031 |
| C10 | -1.156 | 1.571 | 0.440 |
| H10 | -1.669 | 2.479 | 0.738 |
| C9 | 0.225 | 1.510 | 0.486 |
| H9 | 0.791 | 2.374 | 0.824 |
| C14 | -4.109 | -0.385 | 0.089 |
| H14 | -3.759 | -1.417 | 0.199 |
| C15 | -5.574 | -0.246 | 0.040 |
| C16 | -6.206 | 0.998 | -0.101 |
| H16 | -5.606 | 1.896 | -0.181 |
| C17 | -7.593 | 1.045 | -0.134 |
| H17 | -8.109 | 1.994 | -0.240 |
| C18 | -8.311 | -0.146 | -0.029 |
| H18 | -9.395 | -0.157 | -0.051 |
| C19 | -7.599 | -1.336 | 0.105 |
| H19 | -8.124 | -2.284 | 0.188 |
| H1 | 9.056 | 0.655 | -0.353 |

Table S 14. DFT-B3LYP/6-311+G(d) optimized in Methanol.

|  | Coordinates | | |
| --- | --- | --- | --- |
|  | x | y | z |
| O1 | 8.625 | 0.234 | 0.405 |
| N2 | -3.322 | 0.622 | 0.028 |
| N1 | 2.292 | 0.297 | 0.173 |
| H1A | 2.751 | 1.194 | 0.253 |
| N3 | -6.264 | -1.399 | 0.138 |
| C6 | 6.700 | 0.372 | -1.066 |
| H6 | 7.287 | 0.841 | -1.850 |
| C1 | 7.299 | 0.016 | 0.143 |
| C2 | 6.539 | -0.594 | 1.145 |
| H2 | 7.017 | -0.873 | 2.078 |
| C3 | 5.188 | -0.840 | 0.931 |
| H3 | 4.608 | -1.318 | 1.715 |
| C4 | 4.566 | -0.489 | -0.274 |
| C5 | 5.343 | 0.118 | -1.264 |
| H5 | 4.889 | 0.397 | -2.210 |
| C8 | 0.914 | 0.343 | 0.089 |
| C7 | 3.092 | -0.738 | -0.485 |
| H7A | 2.869 | -0.781 | -1.560 |
| H7B | 2.819 | -1.711 | -0.064 |
| C13 | 0.147 | -0.748 | -0.368 |
| H13 | 0.634 | -1.649 | -0.722 |
| C12 | -1.241 | -0.685 | -0.388 |
| H12 | -1.790 | -1.539 | -0.771 |
| C11 | -1.926 | 0.467 | 0.031 |
| C10 | -1.156 | 1.570 | 0.441 |
| H10 | -1.668 | 2.479 | 0.740 |
| C9 | 0.226 | 1.510 | 0.487 |
| H9 | 0.792 | 2.373 | 0.825 |
| C14 | -4.109 | -0.385 | 0.087 |
| H14 | -3.759 | -1.417 | 0.195 |
| C15 | -5.574 | -0.246 | 0.039 |
| C16 | -6.206 | 0.998 | -0.098 |
| H16 | -5.606 | 1.896 | -0.176 |
| C17 | -7.593 | 1.045 | -0.130 |
| H17 | -8.109 | 1.994 | -0.234 |
| C18 | -8.311 | -0.146 | -0.028 |
| H18 | -9.395 | -0.157 | -0.049 |
| C19 | -7.599 | -1.337 | 0.103 |
| H19 | -8.124 | -2.285 | 0.185 |
| H1 | 9.056 | 0.658 | -0.348 |

Table S 15. DFT-B3LYP/6-311+G(d) optimized in Acetonitrile.

|  | Coordinates | | |
| --- | --- | --- | --- |
|  | x | y | z |
| O1 | 8.625 | 0.234 | 0.406 |
| N2 | -3.322 | 0.622 | 0.028 |
| N1 | 2.292 | 0.297 | 0.173 |
| H1A | 2.751 | 1.194 | 0.252 |
| N3 | -6.264 | -1.399 | 0.137 |
| C6 | 6.700 | 0.373 | -1.065 |
| H6 | 7.287 | 0.843 | -1.849 |
| C1 | 7.299 | 0.016 | 0.144 |
| C2 | 6.539 | -0.596 | 1.144 |
| H2 | 7.017 | -0.876 | 2.077 |
| C3 | 5.188 | -0.842 | 0.930 |
| H3 | 4.608 | -1.321 | 1.713 |
| C4 | 4.566 | -0.489 | -0.275 |
| C5 | 5.343 | 0.120 | -1.264 |
| H5 | 4.889 | 0.400 | -2.209 |
| C8 | 0.915 | 0.343 | 0.089 |
| C7 | 3.092 | -0.738 | -0.486 |
| H7A | 2.869 | -0.780 | -1.561 |
| H7B | 2.819 | -1.711 | -0.066 |
| C13 | 0.147 | -0.748 | -0.368 |
| H13 | 0.634 | -1.649 | -0.723 |
| C12 | -1.241 | -0.685 | -0.388 |
| H12 | -1.790 | -1.539 | -0.771 |
| C11 | -1.926 | 0.467 | 0.031 |
| C10 | -1.156 | 1.570 | 0.442 |
| H10 | -1.668 | 2.479 | 0.741 |
| C9 | 0.226 | 1.510 | 0.487 |
| H9 | 0.792 | 2.373 | 0.825 |
| C14 | -4.109 | -0.385 | 0.087 |
| H14 | -3.759 | -1.417 | 0.193 |
| C15 | -5.574 | -0.246 | 0.039 |
| C16 | -6.206 | 0.998 | -0.097 |
| H16 | -5.607 | 1.896 | -0.175 |
| C17 | -7.593 | 1.045 | -0.129 |
| H17 | -8.109 | 1.994 | -0.233 |
| C18 | -8.311 | -0.146 | -0.027 |
| H18 | -9.395 | -0.157 | -0.049 |
| C19 | -7.599 | -1.337 | 0.103 |
| H19 | -8.124 | -2.285 | 0.183 |
| H1 | 9.056 | 0.659 | -0.347 |

Table S 16. DFT-B3LYP/6-311+G(d) optimized in DMSO.

|  | Coordinates | | |
| --- | --- | --- | --- |
|  | x | y | z |
| O1 | 8.625 | 0.233 | 0.408 |
| N2 | -3.322 | 0.622 | 0.029 |
| N1 | 2.292 | 0.298 | 0.172 |
| H1A | 2.751 | 1.195 | 0.251 |
| N3 | -6.264 | -1.399 | 0.135 |
| C6 | 6.700 | 0.376 | -1.063 |
| H6 | 7.287 | 0.848 | -1.846 |
| C1 | 7.299 | 0.015 | 0.145 |
| C2 | 6.539 | -0.599 | 1.144 |
| H2 | 7.017 | -0.882 | 2.076 |
| C3 | 5.188 | -0.845 | 0.928 |
| H3 | 4.608 | -1.327 | 1.710 |
| C4 | 4.566 | -0.489 | -0.275 |
| C5 | 5.343 | 0.123 | -1.263 |
| H5 | 4.889 | 0.406 | -2.208 |
| C8 | 0.915 | 0.344 | 0.088 |
| C7 | 3.092 | -0.737 | -0.487 |
| H7A | 2.870 | -0.778 | -1.562 |
| H7B | 2.819 | -1.711 | -0.068 |
| C13 | 0.147 | -0.748 | -0.369 |
| H13 | 0.634 | -1.648 | -0.724 |
| C12 | -1.241 | -0.685 | -0.388 |
| H12 | -1.790 | -1.538 | -0.772 |
| C11 | -1.926 | 0.467 | 0.031 |
| C10 | -1.156 | 1.570 | 0.442 |
| H10 | -1.668 | 2.478 | 0.742 |
| C9 | 0.226 | 1.510 | 0.486 |
| H9 | 0.792 | 2.373 | 0.825 |
| C14 | -4.109 | -0.385 | 0.086 |
| H14 | -3.759 | -1.418 | 0.190 |
| C15 | -5.574 | -0.246 | 0.039 |
| C16 | -6.207 | 0.998 | -0.095 |
| H16 | -5.607 | 1.897 | -0.172 |
| C17 | -7.594 | 1.045 | -0.126 |
| H17 | -8.109 | 1.994 | -0.228 |
| C18 | -8.311 | -0.147 | -0.026 |
| H18 | -9.395 | -0.157 | -0.048 |
| C19 | -7.599 | -1.337 | 0.101 |
| H19 | -8.124 | -2.285 | 0.181 |
| H1 | 9.056 | 0.661 | -0.344 |

Table S 17. DFT-B3LYP/6-311+G(d) optimized in FormicAcid.

|  | Coordinates | | |
| --- | --- | --- | --- |
|  | x | y | z |
| O1 | 8.625 | 0.233 | 0.408 |
| N2 | -3.322 | 0.622 | 0.029 |
| N1 | 2.292 | 0.298 | 0.172 |
| H1A | 2.751 | 1.195 | 0.251 |
| N3 | -6.264 | -1.399 | 0.134 |
| C6 | 6.700 | 0.377 | -1.063 |
| H6 | 7.287 | 0.850 | -1.845 |
| C1 | 7.299 | 0.015 | 0.145 |
| C2 | 6.539 | -0.600 | 1.143 |
| H2 | 7.017 | -0.883 | 2.075 |
| C3 | 5.188 | -0.846 | 0.928 |
| H3 | 4.608 | -1.328 | 1.709 |
| C4 | 4.566 | -0.488 | -0.276 |
| C5 | 5.343 | 0.124 | -1.262 |
| H5 | 4.889 | 0.407 | -2.207 |
| C8 | 0.915 | 0.344 | 0.088 |
| C7 | 3.092 | -0.737 | -0.488 |
| H7A | 2.870 | -0.777 | -1.563 |
| H7B | 2.819 | -1.710 | -0.069 |
| C13 | 0.147 | -0.748 | -0.369 |
| H13 | 0.634 | -1.648 | -0.725 |
| C12 | -1.241 | -0.685 | -0.389 |
| H12 | -1.790 | -1.538 | -0.772 |
| C11 | -1.926 | 0.467 | 0.031 |
| C10 | -1.156 | 1.570 | 0.442 |
| H10 | -1.668 | 2.478 | 0.742 |
| C9 | 0.226 | 1.511 | 0.486 |
| H9 | 0.792 | 2.374 | 0.825 |
| C14 | -4.109 | -0.386 | 0.086 |
| H14 | -3.759 | -1.418 | 0.190 |
| C15 | -5.574 | -0.246 | 0.039 |
| C16 | -6.207 | 0.998 | -0.095 |
| H16 | -5.607 | 1.897 | -0.171 |
| C17 | -7.594 | 1.045 | -0.126 |
| H17 | -8.109 | 1.994 | -0.227 |
| C18 | -8.311 | -0.147 | -0.026 |
| H18 | -9.395 | -0.157 | -0.047 |
| C19 | -7.599 | -1.337 | 0.101 |
| H19 | -8.124 | -2.285 | 0.180 |
| H1 | 9.056 | 0.661 | -0.343 |

Table S 18. DFT-B3LYP/6-311+G(d) optimized in Water.

|  | Coordinates | | |
| --- | --- | --- | --- |
|  | x | y | z |
| O1 | 8.625 | 0.232 | 0.409 |
| N2 | -3.322 | 0.622 | 0.029 |
| N1 | 2.292 | 0.298 | 0.172 |
| H1A | 2.751 | 1.195 | 0.251 |
| N3 | -6.264 | -1.400 | 0.133 |
| C6 | 6.700 | 0.379 | -1.061 |
| H6 | 7.287 | 0.855 | -1.842 |
| C1 | 7.299 | 0.015 | 0.145 |
| C2 | 6.540 | -0.604 | 1.142 |
| H2 | 7.017 | -0.889 | 2.073 |
| C3 | 5.188 | -0.849 | 0.926 |
| H3 | 4.609 | -1.333 | 1.706 |
| C4 | 4.566 | -0.488 | -0.276 |
| C5 | 5.343 | 0.127 | -1.261 |
| H5 | 4.888 | 0.413 | -2.205 |
| C8 | 0.915 | 0.344 | 0.088 |
| C7 | 3.092 | -0.737 | -0.488 |
| H7A | 2.870 | -0.776 | -1.564 |
| H7B | 2.818 | -1.710 | -0.070 |
| C13 | 0.148 | -0.747 | -0.370 |
| H13 | 0.634 | -1.647 | -0.726 |
| C12 | -1.241 | -0.685 | -0.389 |
| H12 | -1.789 | -1.538 | -0.773 |
| C11 | -1.926 | 0.467 | 0.031 |
| C10 | -1.156 | 1.570 | 0.443 |
| H10 | -1.668 | 2.478 | 0.743 |
| C9 | 0.226 | 1.511 | 0.487 |
| H9 | 0.792 | 2.374 | 0.826 |
| C14 | -4.109 | -0.386 | 0.085 |
| H14 | -3.759 | -1.418 | 0.187 |
| C15 | -5.574 | -0.246 | 0.039 |
| C16 | -6.207 | 0.998 | -0.093 |
| H16 | -5.608 | 1.897 | -0.168 |
| C17 | -7.594 | 1.045 | -0.124 |
| H17 | -8.110 | 1.994 | -0.224 |
| C18 | -8.312 | -0.147 | -0.026 |
| H18 | -9.395 | -0.158 | -0.046 |
| C19 | -7.599 | -1.338 | 0.100 |
| H19 | -8.124 | -2.286 | 0.178 |
| H1 | 9.055 | 0.663 | -0.341 |

Table S 19. DFT-B3LYP/6-311+G(d) optimized in Formamide.

|  | Coordinates | | |
| --- | --- | --- | --- |
|  | x | y | z |
| O1 | 8.625 | 0.231 | 0.411 |
| N2 | -3.322 | 0.621 | 0.030 |
| N1 | 2.293 | 0.299 | 0.170 |
| H1A | 2.750 | 1.196 | 0.249 |
| N3 | -6.265 | -1.400 | 0.131 |
| C6 | 6.700 | 0.381 | -1.060 |
| H6 | 7.288 | 0.857 | -1.840 |
| C1 | 7.299 | 0.015 | 0.147 |
| C2 | 6.539 | -0.605 | 1.142 |
| H2 | 7.016 | -0.892 | 2.073 |
| C3 | 5.188 | -0.850 | 0.926 |
| H3 | 4.608 | -1.336 | 1.704 |
| C4 | 4.566 | -0.488 | -0.277 |
| C5 | 5.343 | 0.128 | -1.261 |
| H5 | 4.889 | 0.416 | -2.204 |
| C8 | 0.915 | 0.344 | 0.087 |
| C7 | 3.092 | -0.736 | -0.490 |
| H7A | 2.871 | -0.775 | -1.565 |
| H7B | 2.818 | -1.709 | -0.072 |
| C13 | 0.148 | -0.747 | -0.370 |
| H13 | 0.634 | -1.647 | -0.726 |
| C12 | -1.241 | -0.685 | -0.389 |
| H12 | -1.789 | -1.539 | -0.772 |
| C11 | -1.926 | 0.467 | 0.031 |
| C10 | -1.156 | 1.570 | 0.442 |
| H10 | -1.668 | 2.478 | 0.742 |
| C9 | 0.226 | 1.511 | 0.485 |
| H9 | 0.791 | 2.374 | 0.824 |
| C14 | -4.110 | -0.386 | 0.084 |
| H14 | -3.759 | -1.419 | 0.185 |
| C15 | -5.574 | -0.246 | 0.039 |
| C16 | -6.207 | 0.998 | -0.091 |
| H16 | -5.608 | 1.897 | -0.165 |
| C17 | -7.594 | 1.046 | -0.121 |
| H17 | -8.110 | 1.995 | -0.219 |
| C18 | -8.312 | -0.147 | -0.024 |
| H18 | -9.395 | -0.158 | -0.045 |
| C19 | -7.599 | -1.338 | 0.099 |
| H19 | -8.124 | -2.286 | 0.175 |
| H1 | 9.056 | 0.664 | -0.338 |

Table S 20. DFT-B3LYP/6-311+G(d) optimized in n-MethylFormamida-mixture.

|  | Coordinates | | |
| --- | --- | --- | --- |
|  | x | y | z |
| O1 | 8.625 | 0.231 | 0.412 |
| N2 | -3.322 | 0.621 | 0.030 |
| N1 | 2.293 | 0.299 | 0.169 |
| H1A | 2.750 | 1.197 | 0.248 |
| N3 | -6.265 | -1.400 | 0.130 |
| C6 | 6.701 | 0.382 | -1.058 |
| H6 | 7.288 | 0.860 | -1.838 |
| C1 | 7.299 | 0.014 | 0.147 |
| C2 | 6.539 | -0.607 | 1.142 |
| H2 | 7.016 | -0.896 | 2.072 |
| C3 | 5.188 | -0.852 | 0.925 |
| H3 | 4.608 | -1.339 | 1.703 |
| C4 | 4.567 | -0.488 | -0.277 |
| C5 | 5.343 | 0.130 | -1.260 |
| H5 | 4.889 | 0.419 | -2.203 |
| C8 | 0.915 | 0.345 | 0.086 |
| C7 | 3.092 | -0.735 | -0.491 |
| H7A | 2.871 | -0.774 | -1.566 |
| H7B | 2.818 | -1.709 | -0.074 |
| C13 | 0.148 | -0.747 | -0.371 |
| H13 | 0.635 | -1.647 | -0.727 |
| C12 | -1.240 | -0.685 | -0.389 |
| H12 | -1.789 | -1.539 | -0.773 |
| C11 | -1.926 | 0.467 | 0.031 |
| C10 | -1.156 | 1.570 | 0.442 |
| H10 | -1.668 | 2.478 | 0.742 |
| C9 | 0.226 | 1.511 | 0.485 |
| H9 | 0.791 | 2.375 | 0.823 |
| C14 | -4.110 | -0.386 | 0.084 |
| H14 | -3.759 | -1.419 | 0.183 |
| C15 | -5.574 | -0.246 | 0.039 |
| C16 | -6.207 | 0.999 | -0.089 |
| H16 | -5.608 | 1.897 | -0.163 |
| C17 | -7.594 | 1.046 | -0.119 |
| H17 | -8.110 | 1.995 | -0.217 |
| C18 | -8.312 | -0.147 | -0.024 |
| H18 | -9.395 | -0.158 | -0.044 |
| C19 | -7.599 | -1.338 | 0.098 |
| H19 | -8.124 | -2.286 | 0.174 |
| H1 | 9.056 | 0.665 | -0.336 |

Table S 21. CAM-B3LYP/6-311+G(d) charges

|  | ε | | | | | | | | | | | | | | | | | | | |
| --- | --- | --- | --- | --- | --- | --- | --- | --- | --- | --- | --- | --- | --- | --- | --- | --- | --- | --- | --- | --- |
|  | 1.00 | 1.43 | 1.91 | 2.37 | 4.71 | 5.70 | 7.43 | 8.93 | 10.13 | 12.47 | 17.33 | 20.49 | 24.85 | 32.61 | 35.69 | 46.83 | 51.10 | 78.36 | 108.94 | 181.56 |
| O1 | -0.68 | -0.68 | -0.70 | -0.70 | -0.72 | -0.72 | -0.73 | -0.73 | -0.73 | -0.73 | -0.73 | -0.74 | -0.74 | -0.74 | -0.74 | -0.74 | -0.74 | -0.74 | -0.74 | -0.74 |
| N2 | -0.60 | -0.61 | -0.62 | -0.63 | -0.65 | -0.66 | -0.65 | -0.65 | -0.65 | -0.66 | -0.66 | -0.67 | -0.67 | -0.67 | -0.67 | -0.67 | -0.67 | -0.67 | -0.67 | -0.67 |
| N1 | -0.58 | -0.58 | -0.59 | -0.60 | -0.65 | -0.65 | -0.67 | -0.67 | -0.66 | -0.66 | -0.67 | -0.69 | -0.69 | -0.70 | -0.70 | -0.70 | -0.70 | -0.70 | -0.70 | -0.70 |
| H1A | 0.29 | 0.29 | 0.30 | 0.30 | 0.32 | 0.32 | 0.33 | 0.33 | 0.33 | 0.33 | 0.33 | 0.34 | 0.34 | 0.34 | 0.34 | 0.34 | 0.34 | 0.34 | 0.34 | 0.34 |
| N3 | -0.69 | -0.71 | -0.72 | -0.73 | -0.73 | -0.74 | -0.74 | -0.75 | -0.75 | -0.76 | -0.76 | -0.78 | -0.78 | -0.78 | -0.78 | -0.78 | -0.78 | -0.78 | -0.78 | -0.78 |
| C6 | -0.36 | -0.32 | -0.33 | -0.34 | -0.35 | -0.35 | -0.35 | -0.36 | -0.35 | -0.35 | -0.35 | -0.38 | -0.39 | -0.39 | -0.39 | -0.39 | -0.39 | -0.39 | -0.39 | -0.38 |
| H6 | 0.14 | 0.14 | 0.14 | 0.15 | 0.15 | 0.15 | 0.16 | 0.16 | 0.16 | 0.16 | 0.16 | 0.17 | 0.17 | 0.17 | 0.17 | 0.17 | 0.17 | 0.17 | 0.17 | 0.17 |
| C1 | 0.49 | 0.46 | 0.48 | 0.48 | 0.50 | 0.50 | 0.50 | 0.50 | 0.50 | 0.50 | 0.50 | 0.52 | 0.53 | 0.53 | 0.53 | 0.53 | 0.53 | 0.53 | 0.53 | 0.53 |
| C2 | -0.27 | -0.24 | -0.25 | -0.25 | -0.27 | -0.27 | -0.26 | -0.27 | -0.26 | -0.27 | -0.27 | -0.28 | -0.28 | -0.29 | -0.29 | -0.29 | -0.28 | -0.28 | -0.28 | -0.28 |
| H2 | 0.17 | 0.17 | 0.17 | 0.17 | 0.17 | 0.17 | 0.17 | 0.17 | 0.17 | 0.17 | 0.17 | 0.17 | 0.17 | 0.17 | 0.17 | 0.17 | 0.17 | 0.17 | 0.17 | 0.17 |
| C3 | -0.08 | -0.12 | -0.11 | -0.11 | -0.10 | -0.11 | -0.11 | -0.11 | -0.11 | -0.11 | -0.10 | -0.10 | -0.11 | -0.10 | -0.10 | -0.10 | -0.11 | -0.10 | -0.10 | -0.09 |
| H3 | 0.10 | 0.11 | 0.11 | 0.11 | 0.11 | 0.11 | 0.11 | 0.11 | 0.12 | 0.11 | 0.11 | 0.12 | 0.12 | 0.12 | 0.12 | 0.12 | 0.12 | 0.12 | 0.11 | 0.11 |
| C4 | -0.01 | 0.01 | 0.00 | 0.00 | -0.05 | -0.04 | -0.07 | -0.07 | -0.06 | -0.06 | -0.08 | -0.09 | -0.09 | -0.09 | -0.09 | -0.09 | -0.09 | -0.10 | -0.10 | -0.10 |
| C5 | -0.06 | -0.09 | -0.09 | -0.08 | -0.08 | -0.08 | -0.08 | -0.07 | -0.07 | -0.07 | -0.06 | -0.04 | -0.05 | -0.04 | -0.04 | -0.04 | -0.04 | -0.04 | -0.04 | -0.05 |
| H5 | 0.11 | 0.11 | 0.12 | 0.12 | 0.13 | 0.13 | 0.13 | 0.13 | 0.13 | 0.13 | 0.13 | 0.12 | 0.13 | 0.12 | 0.12 | 0.13 | 0.13 | 0.12 | 0.12 | 0.13 |
| C8 | 0.37 | 0.37 | 0.38 | 0.38 | 0.39 | 0.39 | 0.40 | 0.40 | 0.40 | 0.39 | 0.40 | 0.40 | 0.40 | 0.41 | 0.41 | 0.41 | 0.41 | 0.41 | 0.42 | 0.42 |
| C7 | 0.18 | 0.20 | 0.21 | 0.21 | 0.32 | 0.30 | 0.35 | 0.34 | 0.31 | 0.31 | 0.33 | 0.35 | 0.36 | 0.37 | 0.36 | 0.35 | 0.35 | 0.36 | 0.36 | 0.37 |
| H7A | -0.01 | -0.02 | -0.02 | -0.02 | -0.05 | -0.04 | -0.05 | -0.05 | -0.04 | -0.04 | -0.04 | -0.05 | -0.05 | -0.05 | -0.05 | -0.05 | -0.05 | -0.05 | -0.05 | -0.05 |
| H7B | 0.03 | 0.02 | 0.02 | 0.02 | 0.00 | 0.00 | -0.01 | 0.00 | 0.00 | 0.00 | 0.00 | 0.00 | -0.01 | -0.01 | -0.01 | 0.00 | 0.00 | 0.00 | 0.00 | -0.01 |
| C13 | -0.21 | -0.22 | -0.22 | -0.23 | -0.24 | -0.24 | -0.25 | -0.24 | -0.24 | -0.23 | -0.23 | -0.22 | -0.22 | -0.22 | -0.22 | -0.22 | -0.22 | -0.22 | -0.23 | -0.23 |
| H13 | 0.13 | 0.13 | 0.14 | 0.14 | 0.15 | 0.15 | 0.15 | 0.15 | 0.15 | 0.15 | 0.15 | 0.15 | 0.15 | 0.15 | 0.15 | 0.15 | 0.15 | 0.15 | 0.15 | 0.15 |
| C12 | -0.26 | -0.27 | -0.27 | -0.27 | -0.27 | -0.28 | -0.27 | -0.28 | -0.28 | -0.29 | -0.29 | -0.31 | -0.31 | -0.31 | -0.31 | -0.31 | -0.31 | -0.31 | -0.31 | -0.30 |
| H12 | 0.15 | 0.15 | 0.16 | 0.16 | 0.16 | 0.16 | 0.16 | 0.16 | 0.16 | 0.17 | 0.17 | 0.17 | 0.17 | 0.17 | 0.17 | 0.17 | 0.17 | 0.18 | 0.18 | 0.17 |
| C11 | 0.44 | 0.45 | 0.45 | 0.45 | 0.46 | 0.47 | 0.46 | 0.46 | 0.45 | 0.46 | 0.46 | 0.48 | 0.47 | 0.47 | 0.47 | 0.47 | 0.47 | 0.47 | 0.47 | 0.47 |
| C10 | -0.19 | -0.19 | -0.20 | -0.20 | -0.23 | -0.23 | -0.23 | -0.23 | -0.22 | -0.23 | -0.23 | -0.24 | -0.23 | -0.23 | -0.23 | -0.23 | -0.23 | -0.22 | -0.23 | -0.23 |
| H10 | 0.14 | 0.14 | 0.14 | 0.14 | 0.15 | 0.15 | 0.15 | 0.15 | 0.15 | 0.15 | 0.15 | 0.15 | 0.15 | 0.15 | 0.15 | 0.15 | 0.15 | 0.15 | 0.15 | 0.15 |
| C9 | -0.29 | -0.30 | -0.30 | -0.30 | -0.29 | -0.30 | -0.30 | -0.30 | -0.30 | -0.30 | -0.30 | -0.30 | -0.30 | -0.30 | -0.31 | -0.31 | -0.31 | -0.31 | -0.31 | -0.31 |
| H9 | 0.14 | 0.15 | 0.15 | 0.15 | 0.15 | 0.16 | 0.16 | 0.16 | 0.16 | 0.16 | 0.16 | 0.16 | 0.16 | 0.16 | 0.16 | 0.16 | 0.16 | 0.16 | 0.16 | 0.16 |
| C14 | 0.22 | 0.22 | 0.22 | 0.23 | 0.25 | 0.25 | 0.25 | 0.24 | 0.24 | 0.24 | 0.24 | 0.25 | 0.26 | 0.26 | 0.26 | 0.26 | 0.26 | 0.26 | 0.26 | 0.26 |
| H14 | 0.02 | 0.02 | 0.02 | 0.02 | 0.02 | 0.02 | 0.02 | 0.02 | 0.02 | 0.02 | 0.02 | 0.02 | 0.02 | 0.02 | 0.02 | 0.02 | 0.02 | 0.02 | 0.02 | 0.02 |
| C15 | 0.51 | 0.51 | 0.52 | 0.52 | 0.50 | 0.50 | 0.50 | 0.51 | 0.51 | 0.51 | 0.51 | 0.53 | 0.53 | 0.53 | 0.53 | 0.53 | 0.53 | 0.53 | 0.52 | 0.52 |
| C16 | -0.31 | -0.31 | -0.32 | -0.32 | -0.29 | -0.29 | -0.29 | -0.30 | -0.30 | -0.30 | -0.30 | -0.34 | -0.34 | -0.34 | -0.34 | -0.34 | -0.34 | -0.34 | -0.33 | -0.33 |
| H16 | 0.12 | 0.12 | 0.12 | 0.12 | 0.11 | 0.11 | 0.11 | 0.11 | 0.11 | 0.11 | 0.11 | 0.12 | 0.12 | 0.12 | 0.12 | 0.12 | 0.12 | 0.12 | 0.12 | 0.12 |
| C17 | 0.13 | 0.13 | 0.14 | 0.15 | 0.12 | 0.13 | 0.14 | 0.15 | 0.15 | 0.15 | 0.14 | 0.18 | 0.18 | 0.18 | 0.18 | 0.18 | 0.18 | 0.18 | 0.17 | 0.18 |
| H17 | 0.07 | 0.08 | 0.08 | 0.08 | 0.09 | 0.09 | 0.09 | 0.08 | 0.08 | 0.09 | 0.09 | 0.08 | 0.08 | 0.08 | 0.08 | 0.08 | 0.08 | 0.08 | 0.08 | 0.08 |
| C18 | -0.35 | -0.35 | -0.36 | -0.37 | -0.35 | -0.35 | -0.37 | -0.37 | -0.38 | -0.37 | -0.37 | -0.40 | -0.40 | -0.40 | -0.40 | -0.40 | -0.40 | -0.39 | -0.39 | -0.39 |
| H18 | 0.13 | 0.13 | 0.13 | 0.14 | 0.14 | 0.14 | 0.15 | 0.15 | 0.15 | 0.15 | 0.15 | 0.16 | 0.16 | 0.16 | 0.16 | 0.16 | 0.16 | 0.16 | 0.16 | 0.16 |
| C19 | 0.43 | 0.43 | 0.44 | 0.45 | 0.43 | 0.43 | 0.45 | 0.45 | 0.45 | 0.46 | 0.45 | 0.48 | 0.48 | 0.48 | 0.48 | 0.48 | 0.48 | 0.47 | 0.48 | 0.48 |
| H19 | 0.01 | 0.01 | 0.01 | 0.01 | 0.02 | 0.02 | 0.01 | 0.01 | 0.01 | 0.01 | 0.01 | 0.01 | 0.01 | 0.01 | 0.01 | 0.01 | 0.01 | 0.01 | 0.01 | 0.01 |
| H1 | 0.45 | 0.46 | 0.46 | 0.47 | 0.48 | 0.48 | 0.49 | 0.49 | 0.49 | 0.49 | 0.49 | 0.49 | 0.49 | 0.49 | 0.49 | 0.49 | 0.49 | 0.50 | 0.50 | 0.50 |

Table S 22. DFT-B3LYP/6-311+G(d) calculed

|  | HOMO | LUMO | GAP |
| --- | --- | --- | --- |
| Gas-Phase | -5.351666 | -1.886022 | 3.466 |
| Argon | -5.372347 | -1.93337 | 3.439 |
| Heptane | -5.392211 | -1.97201 | 3.42 |
| Toluene | -5.407449 | -1.999222 | 3.408 |
| Chloroform | -5.448811 | -2.068883 | 3.38 |
| ChloroBezene | -5.459967 | -2.084665 | 3.375 |
| Tetrahydrofuran | -5.471124 | -2.10262 | 3.368 |
| DichloroMethane | -5.478471 | -2.113237 | 3.365 |
| DiChloroEthane | -5.482825 | -2.119768 | 3.363 |
| 2-Methyl-2-Propanol | -5.490444 | -2.129564 | 3.36 |
| 1-Butanol | -5.498608 | -2.141265 | 3.357 |
| Acetone | -5.502145 | -2.146163 | 3.356 |
| Ethanol | -5.505683 | -2.151061 | 3.355 |
| Methanol | -5.509492 | -2.156503 | 3.353 |
| Acetonitrile | -5.510581 | -2.157864 | 3.353 |
| DMSO | -5.513302 | -2.161674 | 3.352 |
| FormicAcid | -5.514118 | -2.162762 | 3.351 |
| Water | -5.517111 | -2.166844 | 3.35 |
| Formamide | -5.518744 | -2.169021 | 3.35 |
| n-MethylFormamide-mixture | -5.520377 | -2.171198 | 3.349 |

Table S 23. CAM-B3LYP/6-311+G(d) calculate

|  | ε | | | | | | | | | | | | | | | | | | | |
| --- | --- | --- | --- | --- | --- | --- | --- | --- | --- | --- | --- | --- | --- | --- | --- | --- | --- | --- | --- | --- |
| ω in a.u. | 1.00 | 1.43 | 1.91 | 2.37 | 4.71 | 5.70 | 7.43 | 8.93 | 10.13 | 12.47 | 17.33 | 20.49 | 24.85 | 32.61 | 35.69 | 46.83 | 51.10 | 78.36 | 108.94 | 181.56 |
| 0.000 | 24.39 | 29.66 | 33.74 | 36.56 | 43.11 | 44.55 | 46.38 | 47.44 | 48.07 | 48.87 | 50.05 | 50.51 | 50.97 | 51.50 | 51.65 | 52.03 | 52.14 | 52.52 | 52.77 | 53.00 |
| 0.002 | 24.55 | 29.86 | 34.05 | 36.20 | 36.22 | 37.54 | 36.03 | 36.50 | 36.91 | 36.01 | 36.38 | 35.73 | 35.82 | 35.30 | 35.60 | 36.93 | 36.16 | 35.51 | 37.54 | 37.32 |
| 0.003 | 24.58 | 29.91 | 34.10 | 36.26 | 36.29 | 37.61 | 36.09 | 36.56 | 36.98 | 36.08 | 36.44 | 35.79 | 35.89 | 35.36 | 35.67 | 37.00 | 36.22 | 35.57 | 37.61 | 37.39 |
| 0.004 | 24.64 | 29.98 | 34.19 | 36.35 | 36.38 | 37.70 | 36.18 | 36.65 | 37.07 | 36.17 | 36.53 | 35.88 | 35.98 | 35.45 | 35.75 | 37.09 | 36.31 | 35.66 | 37.70 | 37.48 |
| 0.005 | 24.71 | 30.07 | 34.29 | 36.46 | 36.49 | 37.82 | 36.30 | 36.77 | 37.18 | 36.28 | 36.65 | 35.99 | 36.09 | 35.56 | 35.87 | 37.21 | 36.43 | 35.77 | 37.82 | 37.60 |
| 0.006 | 24.80 | 30.18 | 34.42 | 36.60 | 36.63 | 37.97 | 36.44 | 36.91 | 37.33 | 36.42 | 36.79 | 36.13 | 36.23 | 35.70 | 36.01 | 37.35 | 36.57 | 35.91 | 37.97 | 37.75 |
| 0.007 | 24.90 | 30.31 | 34.58 | 36.77 | 36.80 | 38.15 | 36.60 | 37.08 | 37.50 | 36.59 | 36.96 | 36.30 | 36.40 | 35.86 | 36.17 | 37.52 | 36.74 | 36.07 | 38.14 | 37.92 |
| 0.008 | 25.02 | 30.46 | 34.76 | 36.97 | 37.00 | 38.35 | 36.80 | 37.28 | 37.70 | 36.78 | 37.16 | 36.49 | 36.59 | 36.05 | 36.36 | 37.72 | 36.93 | 36.27 | 38.35 | 38.13 |
| 0.009 | 25.16 | 30.64 | 34.97 | 37.19 | 37.22 | 38.59 | 37.02 | 37.50 | 37.93 | 37.01 | 37.38 | 36.71 | 36.81 | 36.27 | 36.58 | 37.95 | 37.16 | 36.48 | 38.58 | 38.36 |
| 0.010 | 25.32 | 30.84 | 35.20 | 37.44 | 37.47 | 38.85 | 37.27 | 37.76 | 38.19 | 37.26 | 37.63 | 36.96 | 37.06 | 36.51 | 36.83 | 38.21 | 37.41 | 36.73 | 38.85 | 38.62 |
| 0.0239 | 29.73 | 36.48 | 41.86 | 44.64 | 44.73 | 46.44 | 44.48 | 45.09 | 45.62 | 44.46 | 44.93 | 44.09 | 44.22 | 43.54 | 43.93 | 45.65 | 44.65 | 43.81 | 46.44 | 46.16 |
| 0.0428 | 50.33 | 63.53 | 74.45 | 80.24 | 80.75 | 84.38 | 80.26 | 81.54 | 82.68 | 80.24 | 81.23 | 79.46 | 79.73 | 78.30 | 79.12 | 82.74 | 80.63 | 78.87 | 84.40 | 83.80 |
| 0.050 | 73.06 | 94.64 | 113.17 | 123.25 | 124.57 | 130.99 | 123.75 | 126.00 | 128.02 | 123.73 | 125.47 | 122.37 | 122.83 | 120.34 | 121.77 | 128.14 | 124.42 | 121.32 | 131.07 | 129.99 |
| 0.060 | 194.49 | 284.30 | 378.26 | 437.67 | 453.82 | 496.22 | 449.04 | 463.58 | 476.87 | 448.97 | 460.04 | 440.27 | 443.12 | 427.58 | 436.39 | 477.18 | 452.90 | 433.39 | 496.56 | 489.08 |
| 0.072 | 236.70 | 254.32 | 268.37 | 275.76 | 275.61 | 280.69 | 276.10 | 278.03 | 279.64 | 277.27 | 278.96 | 277.08 | 277.63 | 276.19 | 277.27 | 281.80 | 279.33 | 277.44 | 284.20 | 283.63 |
| 0.080 | 21.76 | 29.94 | 38.01 | 42.69 | 55.57 | 60.18 | 60.37 | 62.67 | 64.37 | 64.76 | 66.96 | 66.53 | 67.35 | 67.09 | 67.81 | 70.59 | 69.30 | 68.77 | 72.16 | 71.91 |
| 0.085 | 333.34 | 346.75 | 361.44 | 368.76 | 369.40 | 374.76 | 363.41 | 364.21 | 365.50 | 359.72 | 359.47 | 354.95 | 354.64 | 350.64 | 352.02 | 358.64 | 354.07 | 349.73 | 360.19 | 358.38 |
| 0.090 | 243.05 | 283.63 | 318.02 | 335.89 | 333.77 | 344.45 | 327.40 | 330.17 | 333.11 | 323.36 | 324.78 | 318.05 | 318.13 | 312.47 | 314.93 | 326.28 | 319.03 | 312.54 | 330.47 | 328.01 |
| 0.10 | 606.87 | 1014.39 | 1124.70 | 1419.25 | 2124.84 | 2390.60 | 2376.58 | 2509.11 | 2663.00 | 2363.81 | 2586.84 | 2640.75 | 2686.72 | 2734.96 | 2749.79 | 2773.83 | 2791.62 | 2835.72 | 2795.92 | 2843.35 |


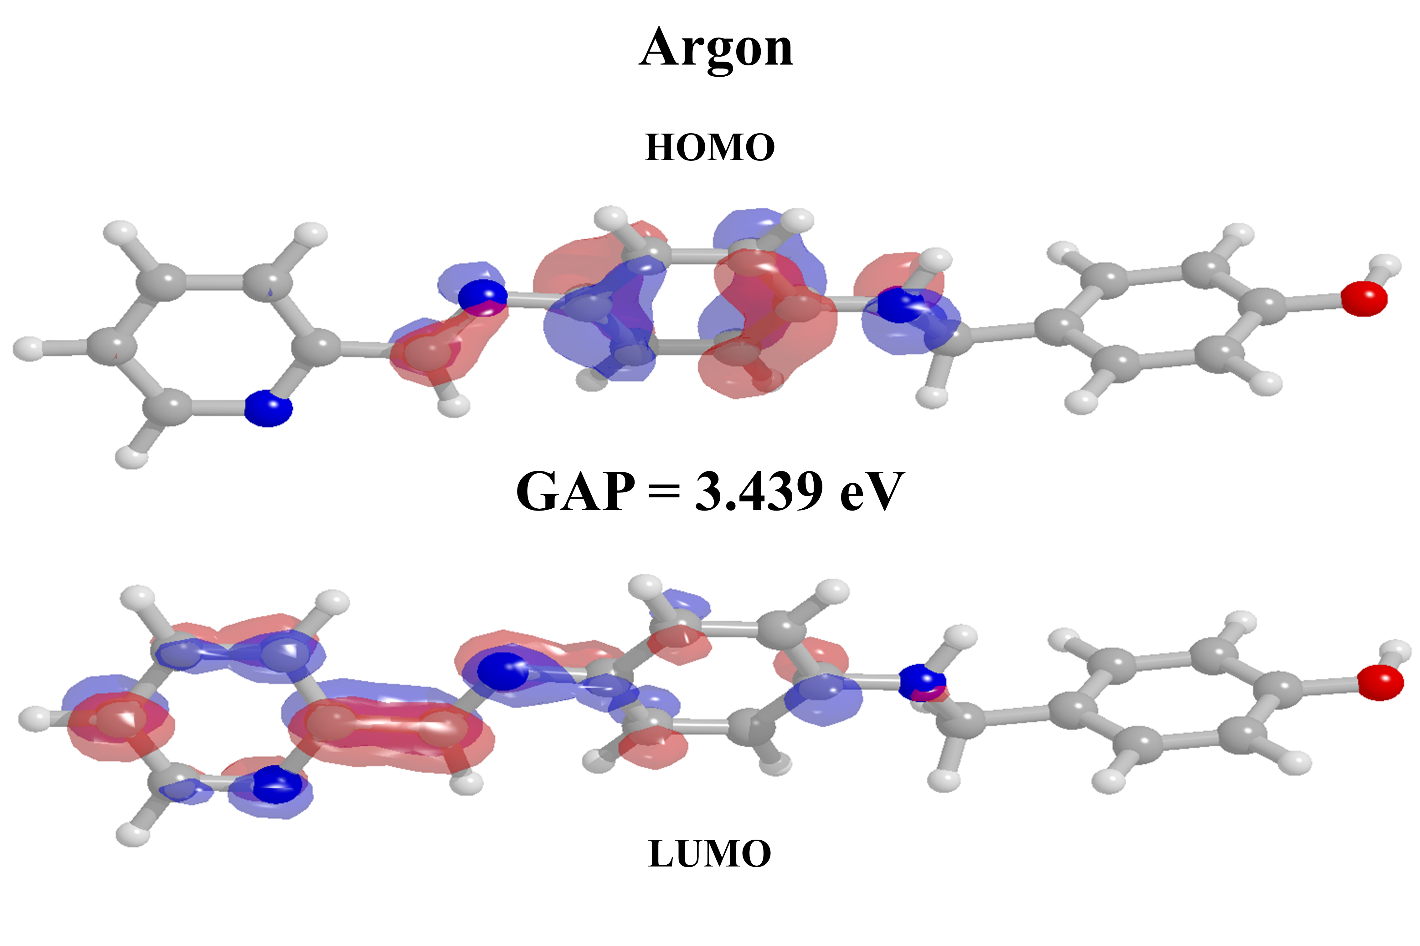


Figure S 1. HOMO and LUMO in argon.


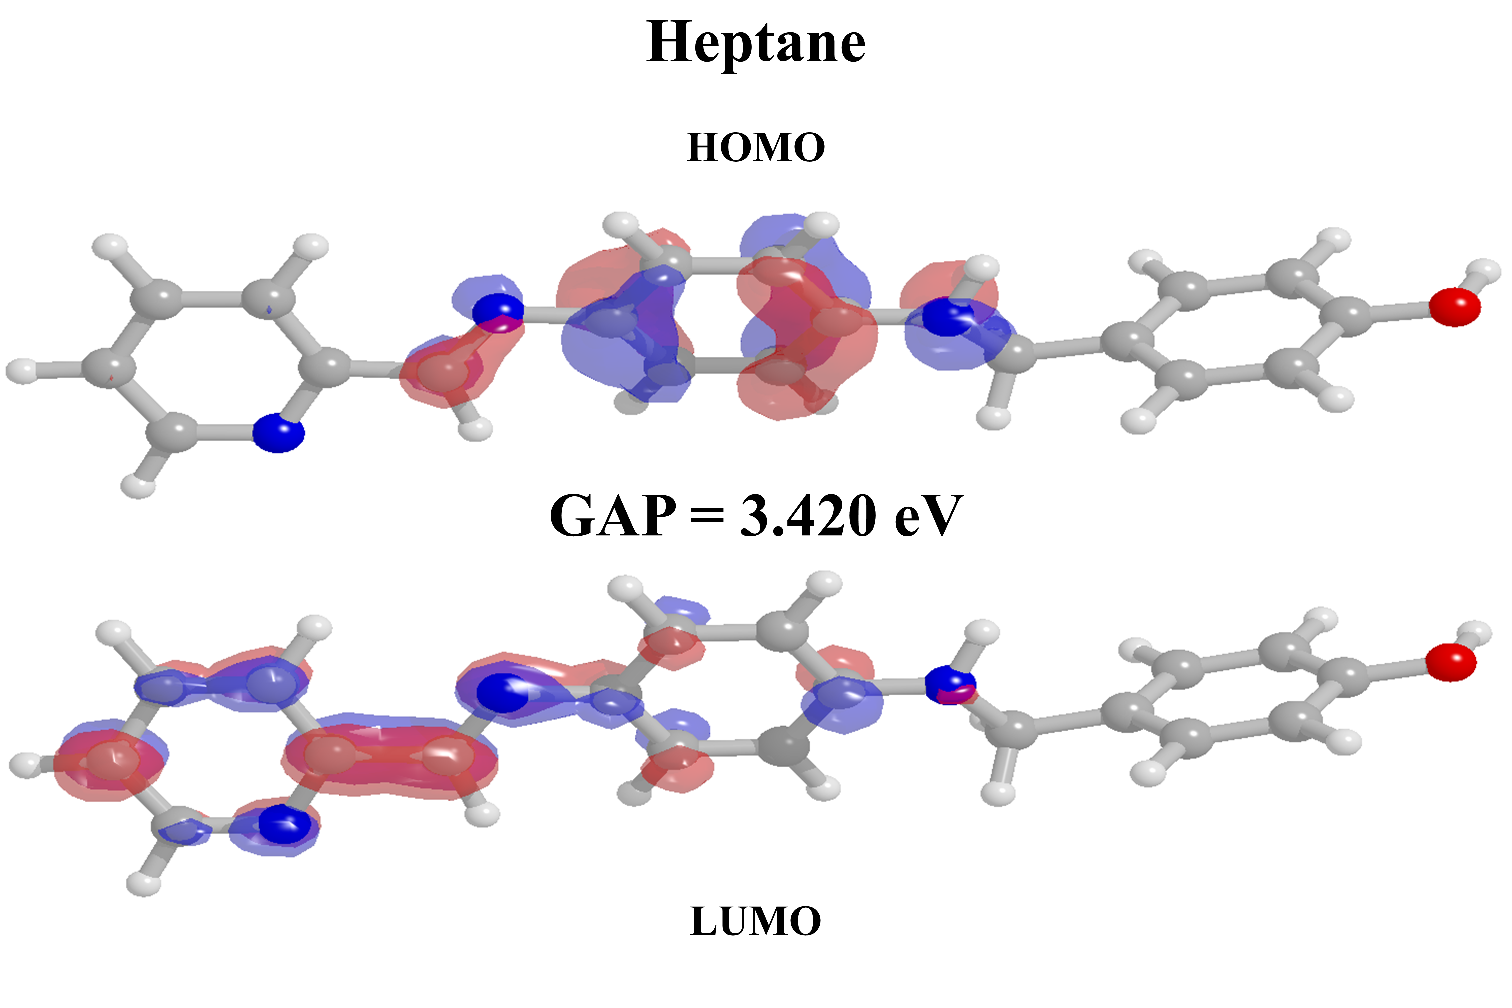


Figure S 2. HOMO and LUMO in heptane.


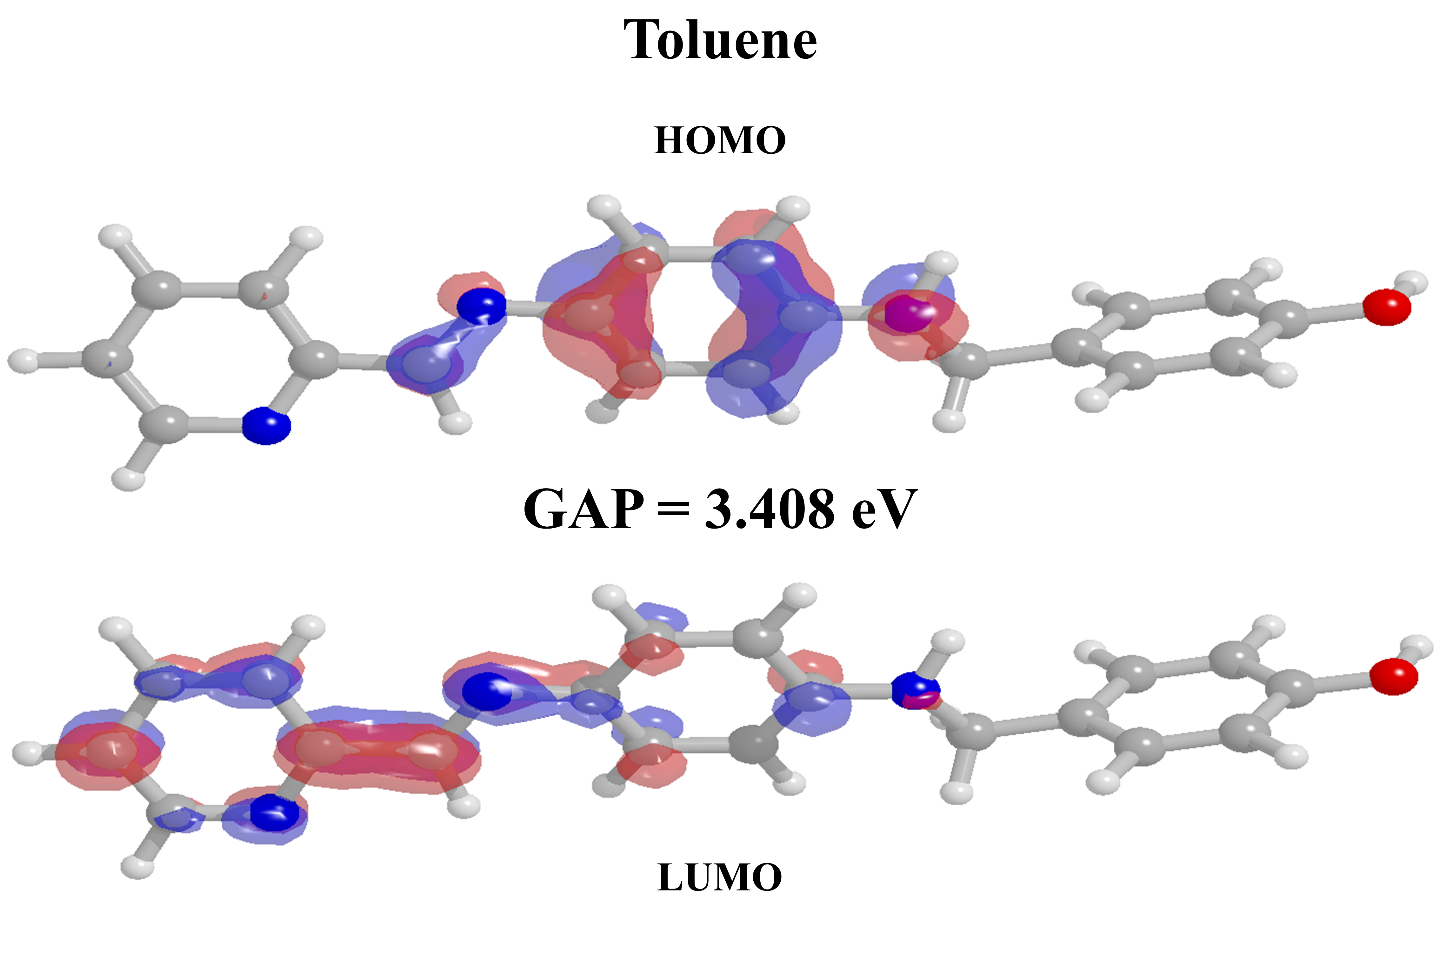


Figure S 3. HOMO and LUMO in toluene.


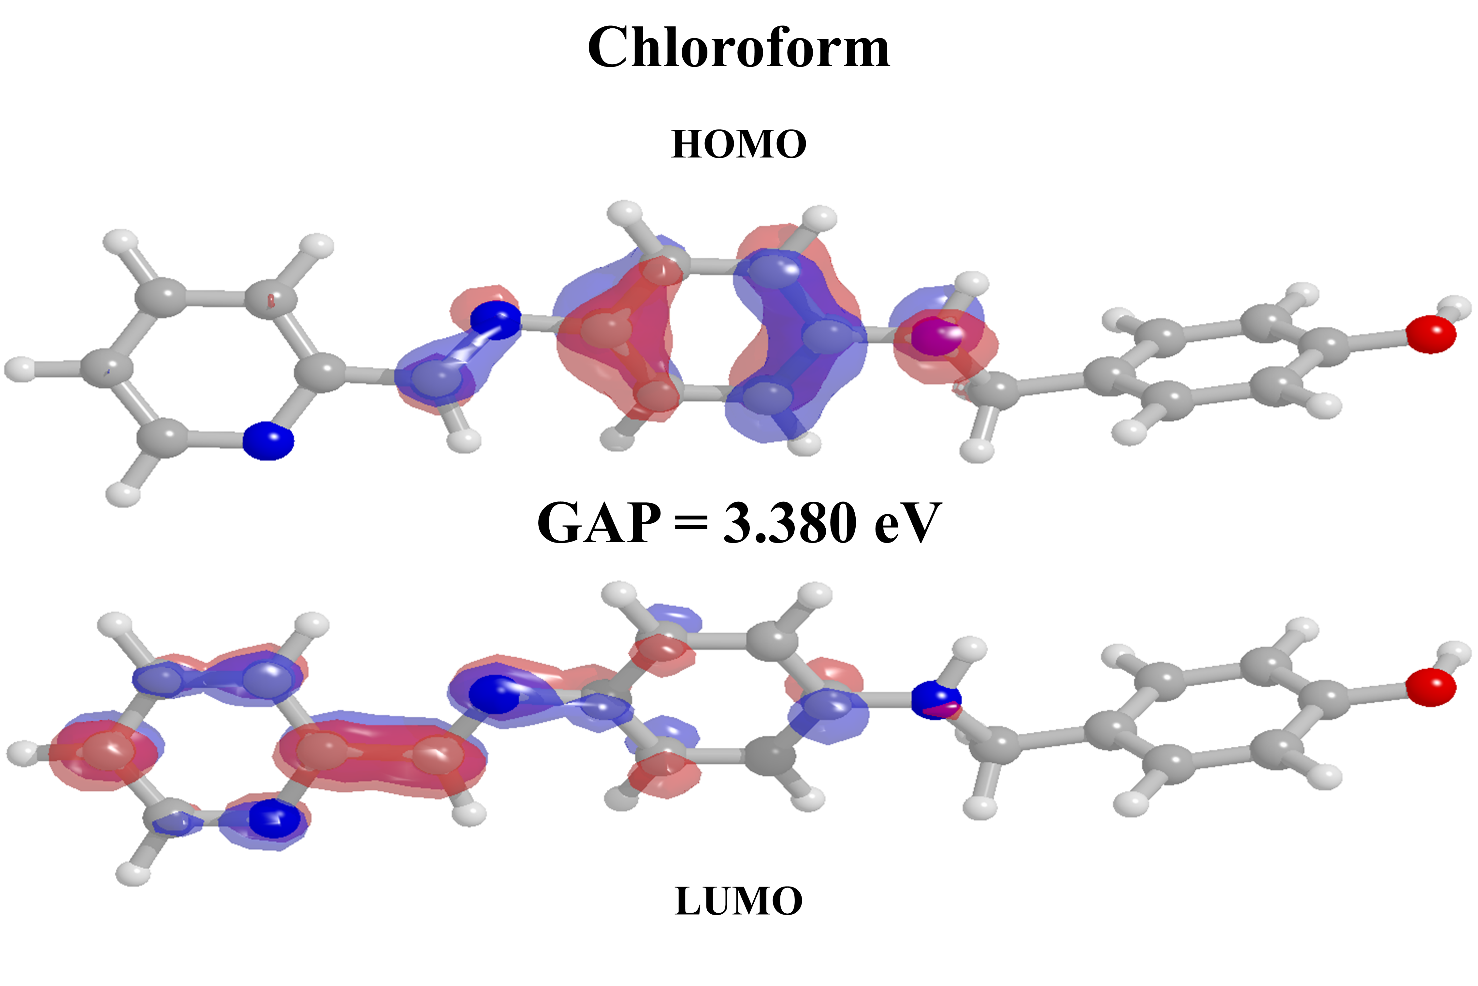


Figure S 4. HOMO and LUMO in chloroform.


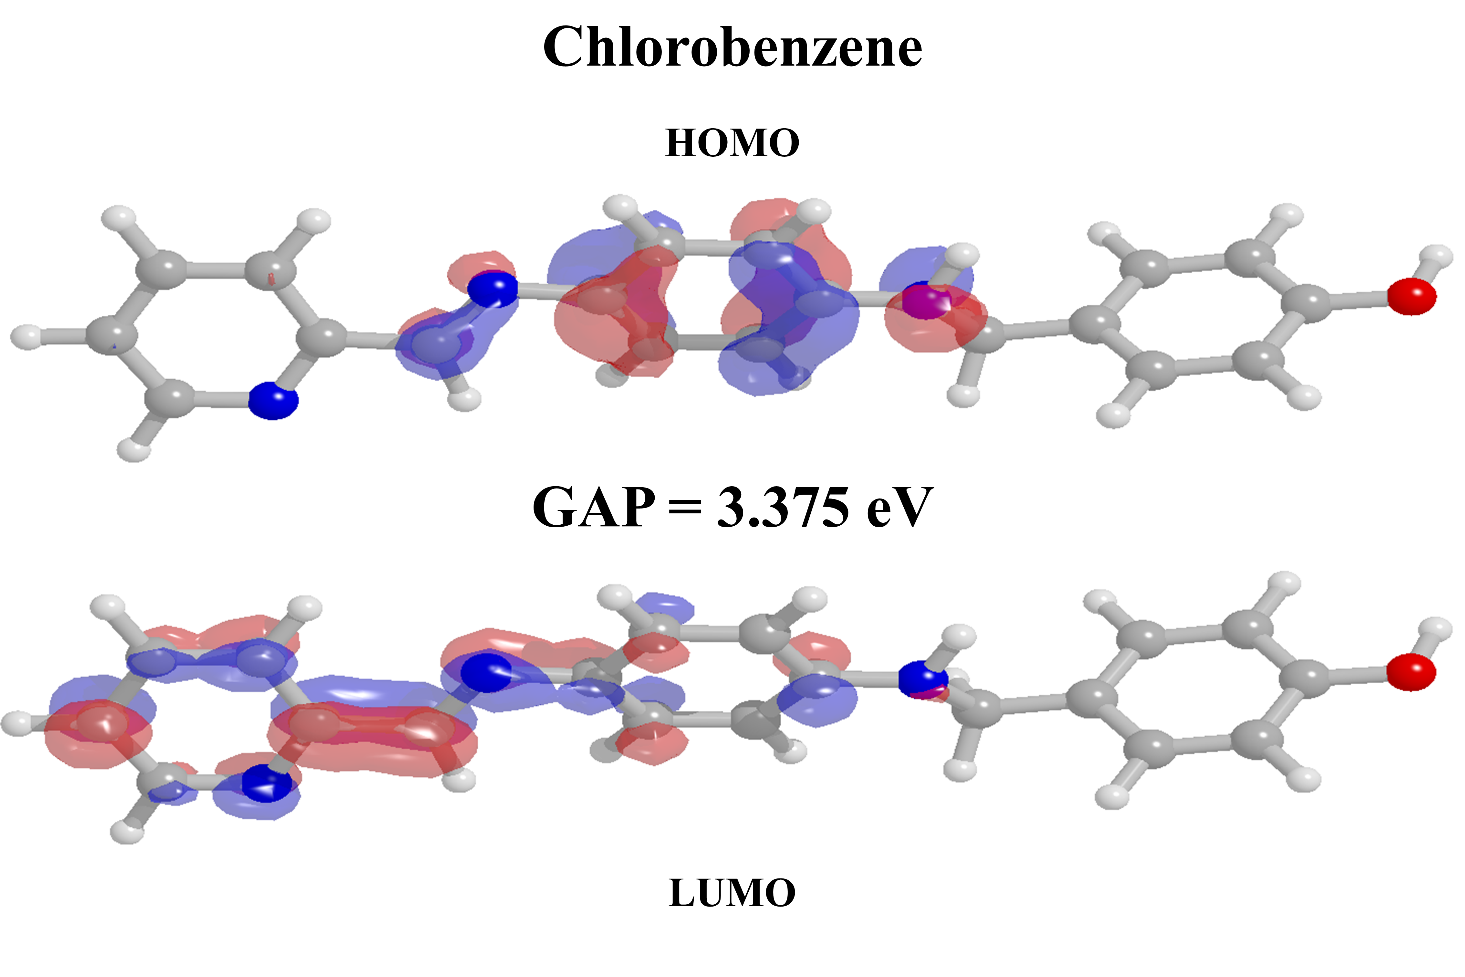


Figure S 5. HOMO and LUMO in chlorobenzene.


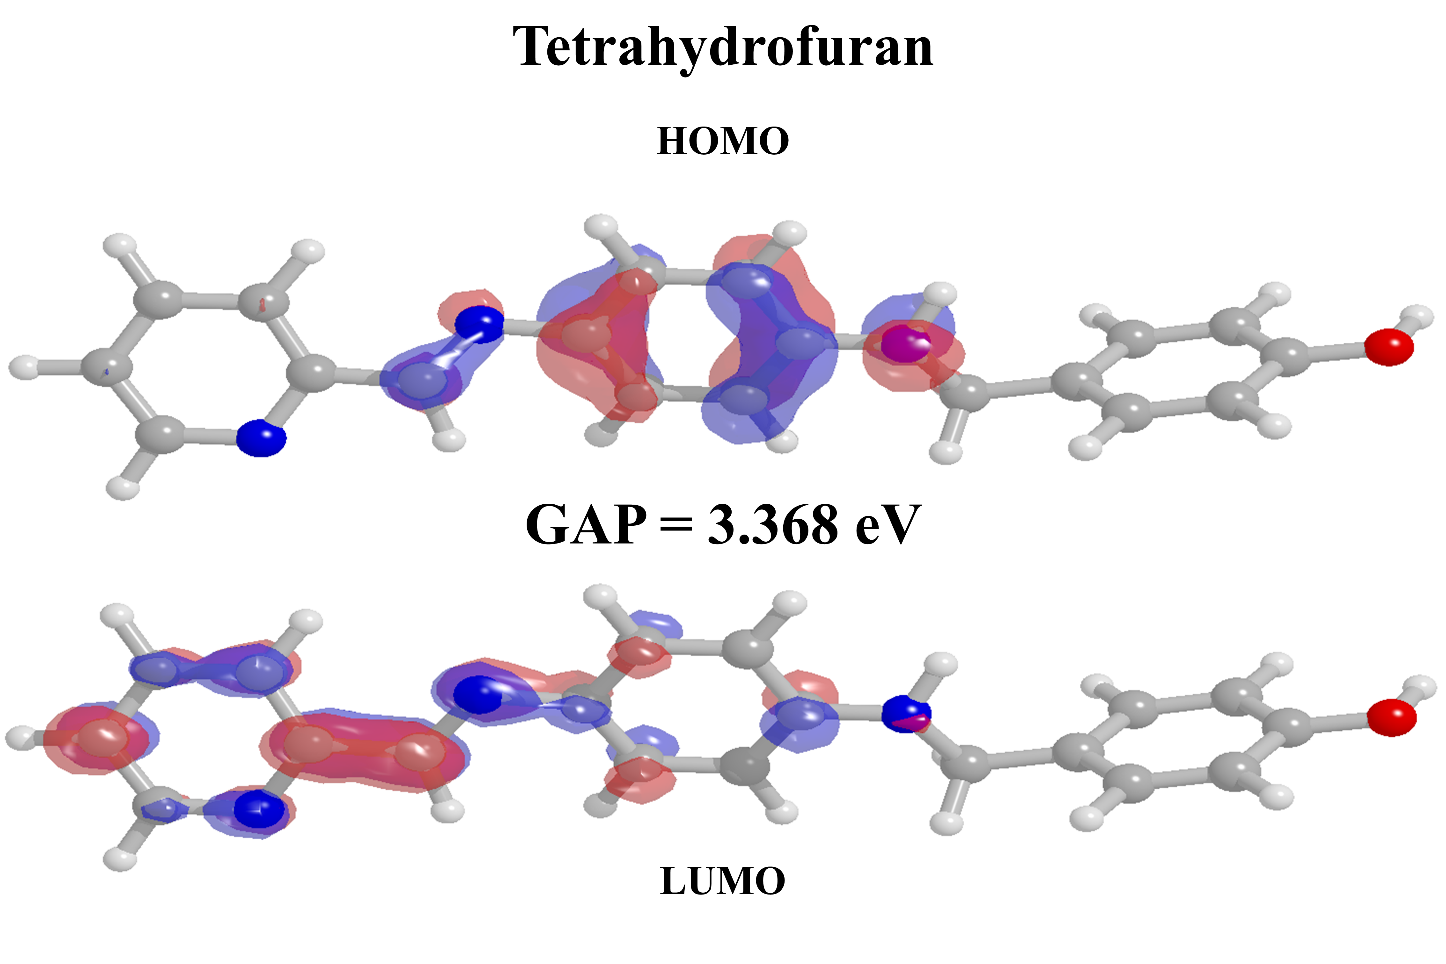


Figure S 6. HOMO and LUMO in tetrahydrofuran.


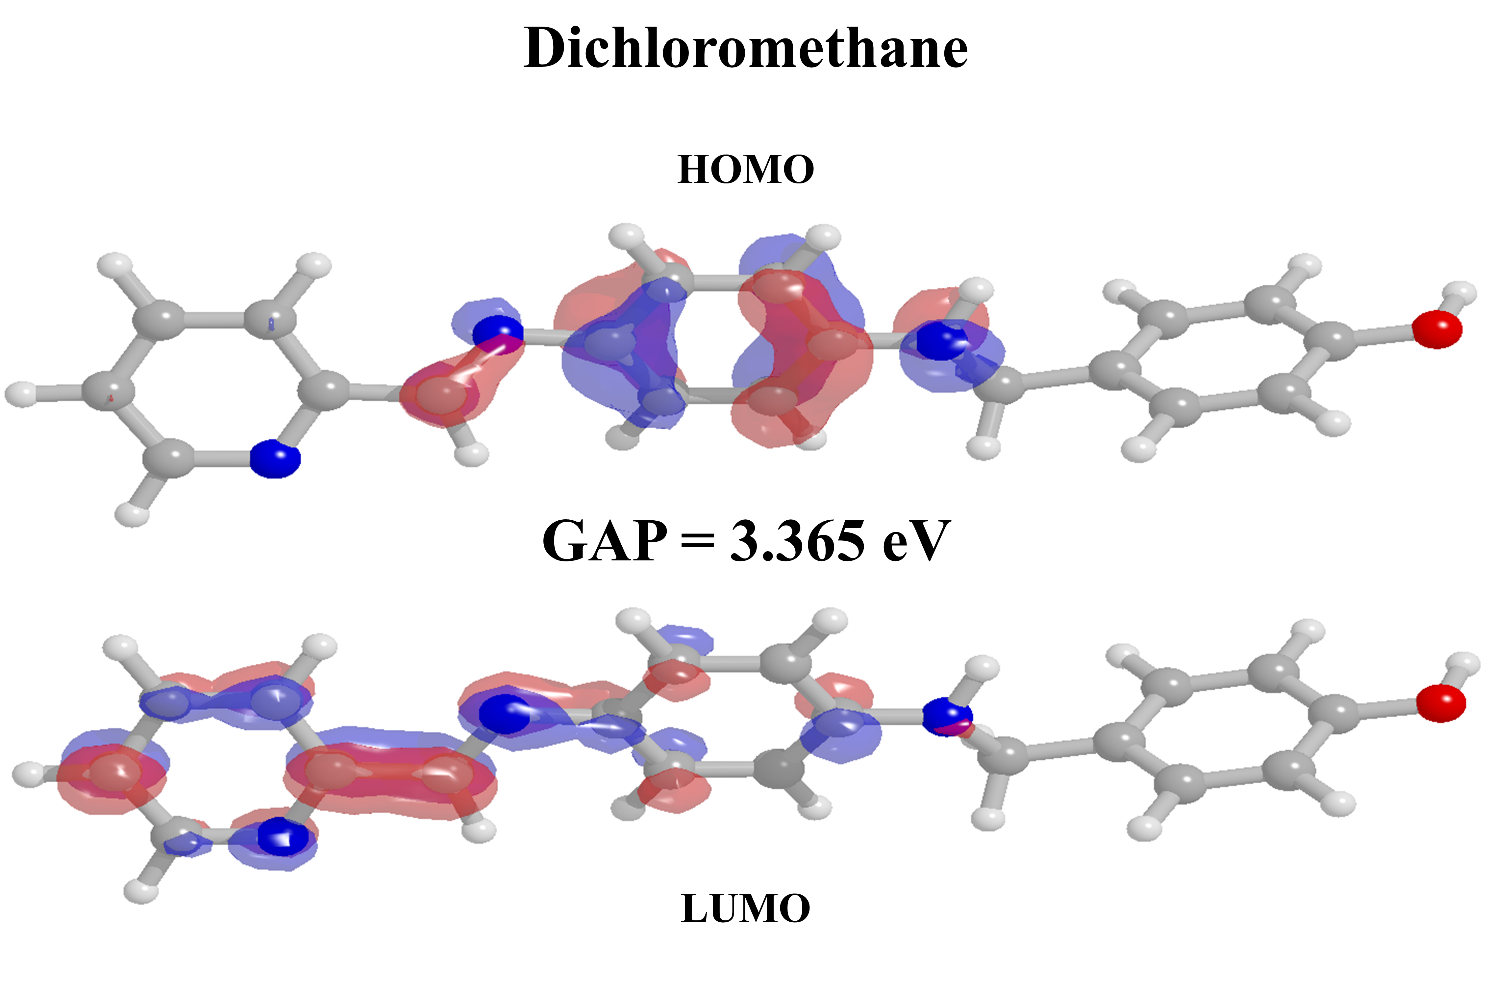


Figure S 7. HOMO and LUMO in dichloromethane.


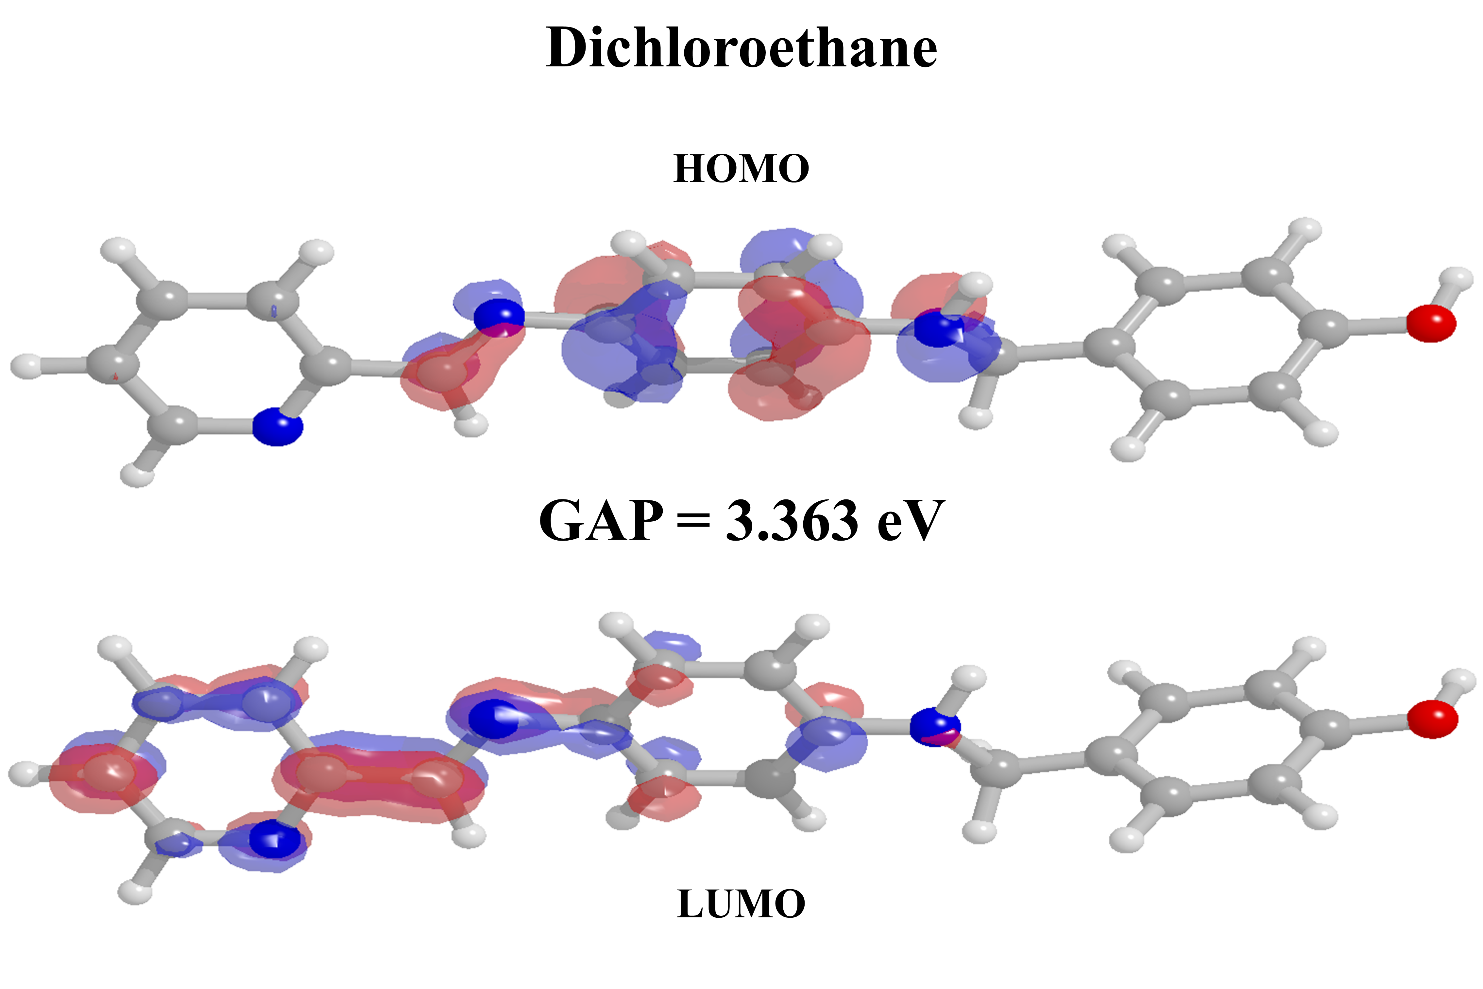


Figure S 8. HOMO and LUMO in dichloroethane.


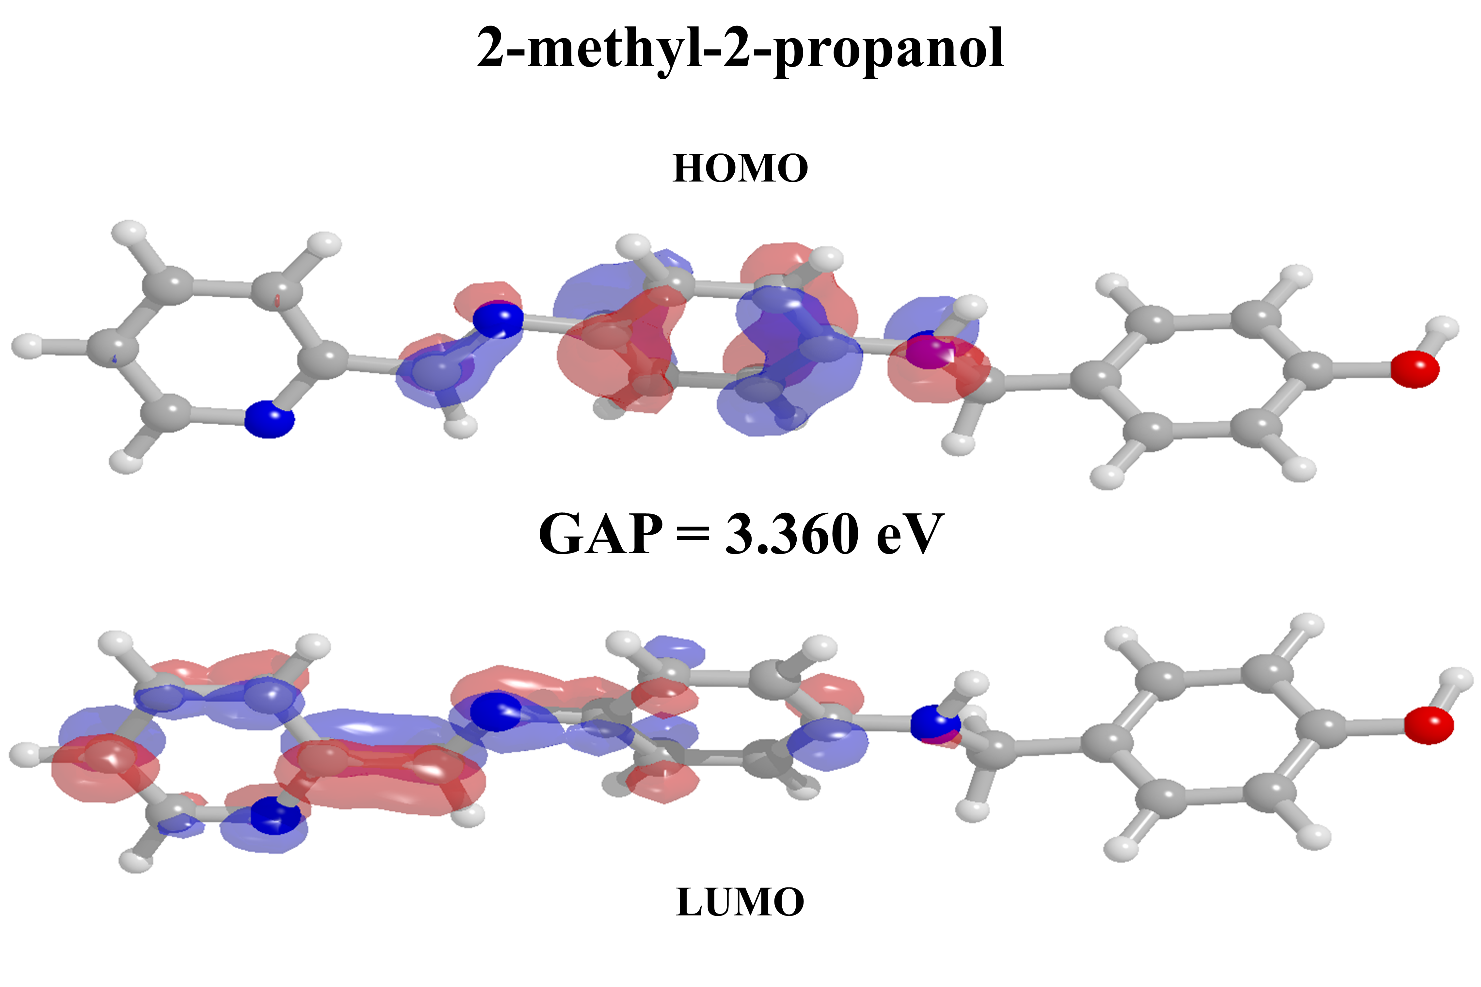


Figure S 9. HOMO and LUMO in 2-methyl-2-propanol.


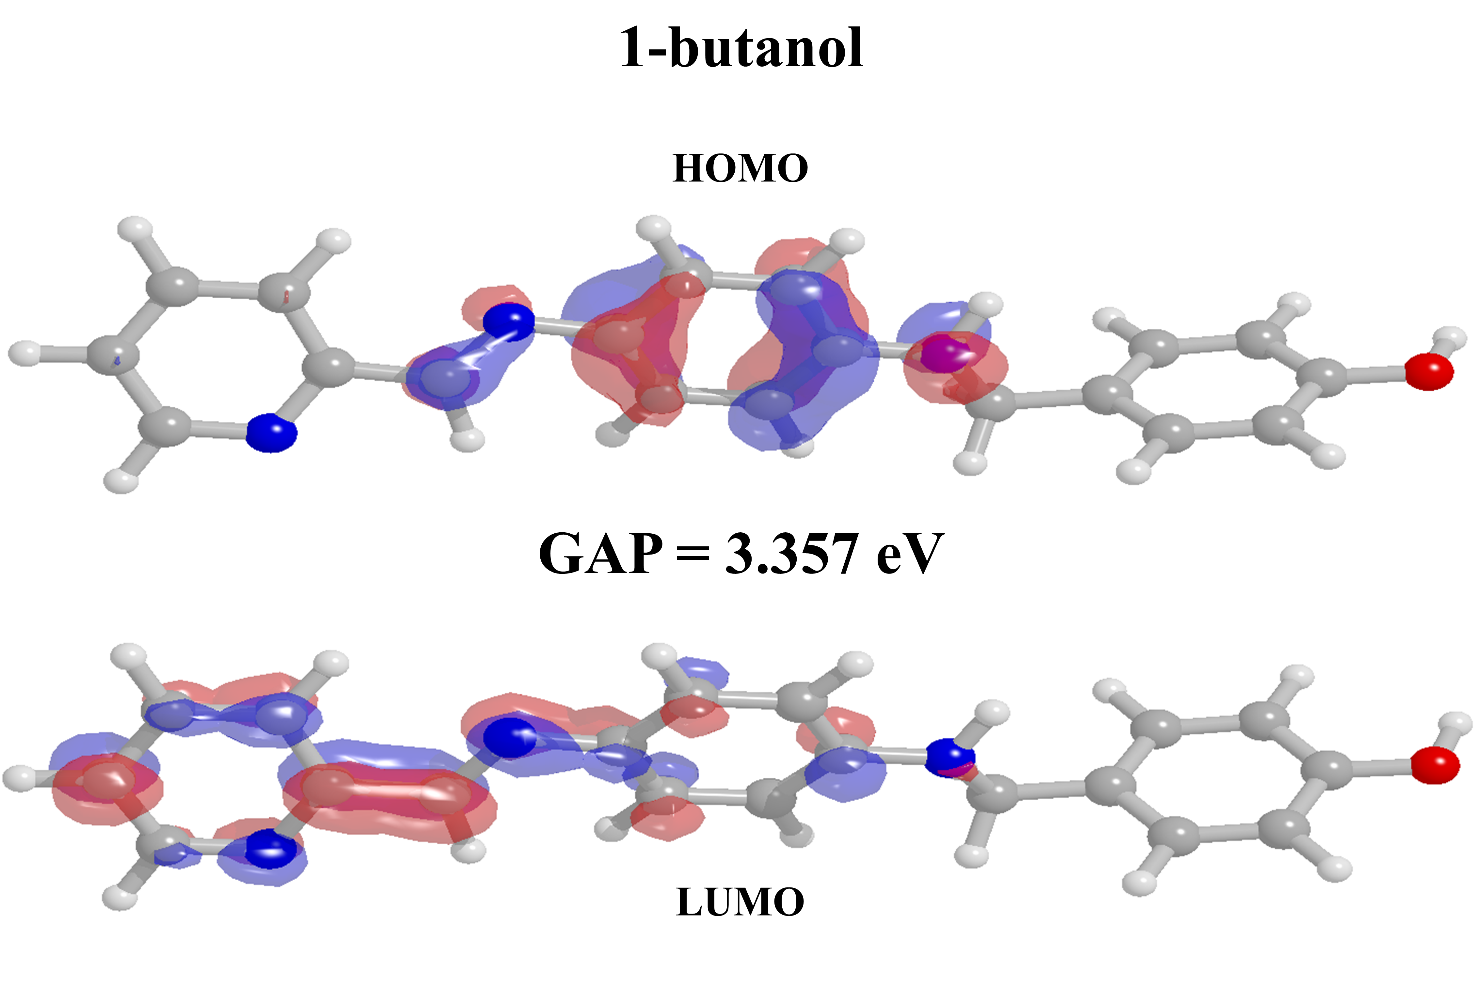


Figure S 10. HOMO and LUMO in 1-butanol.


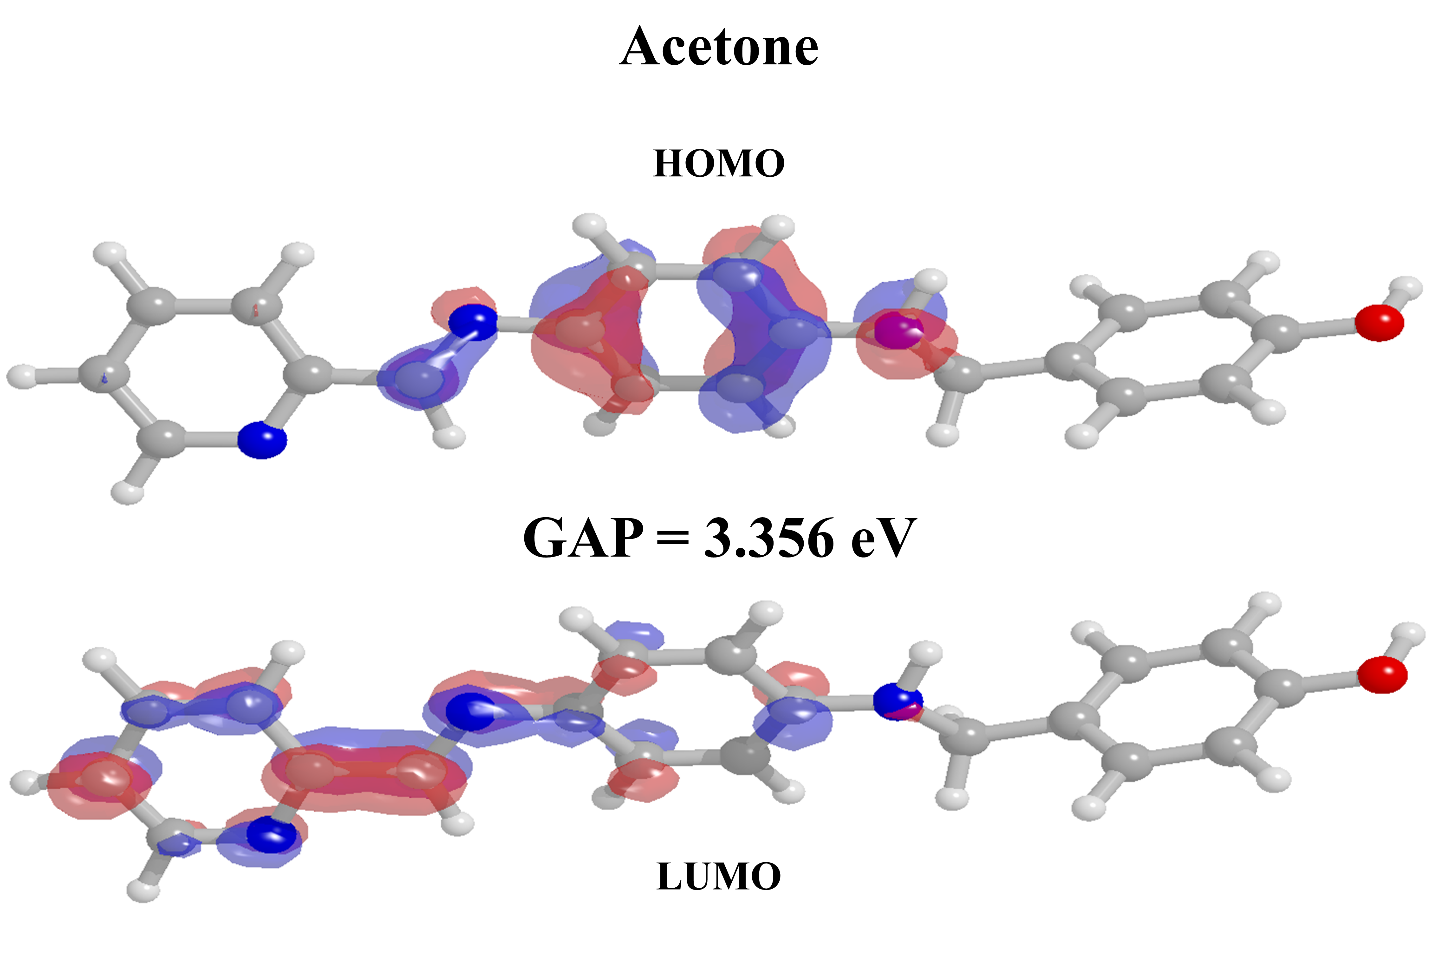


Figure S 11. HOMO and LUMO in acetone.


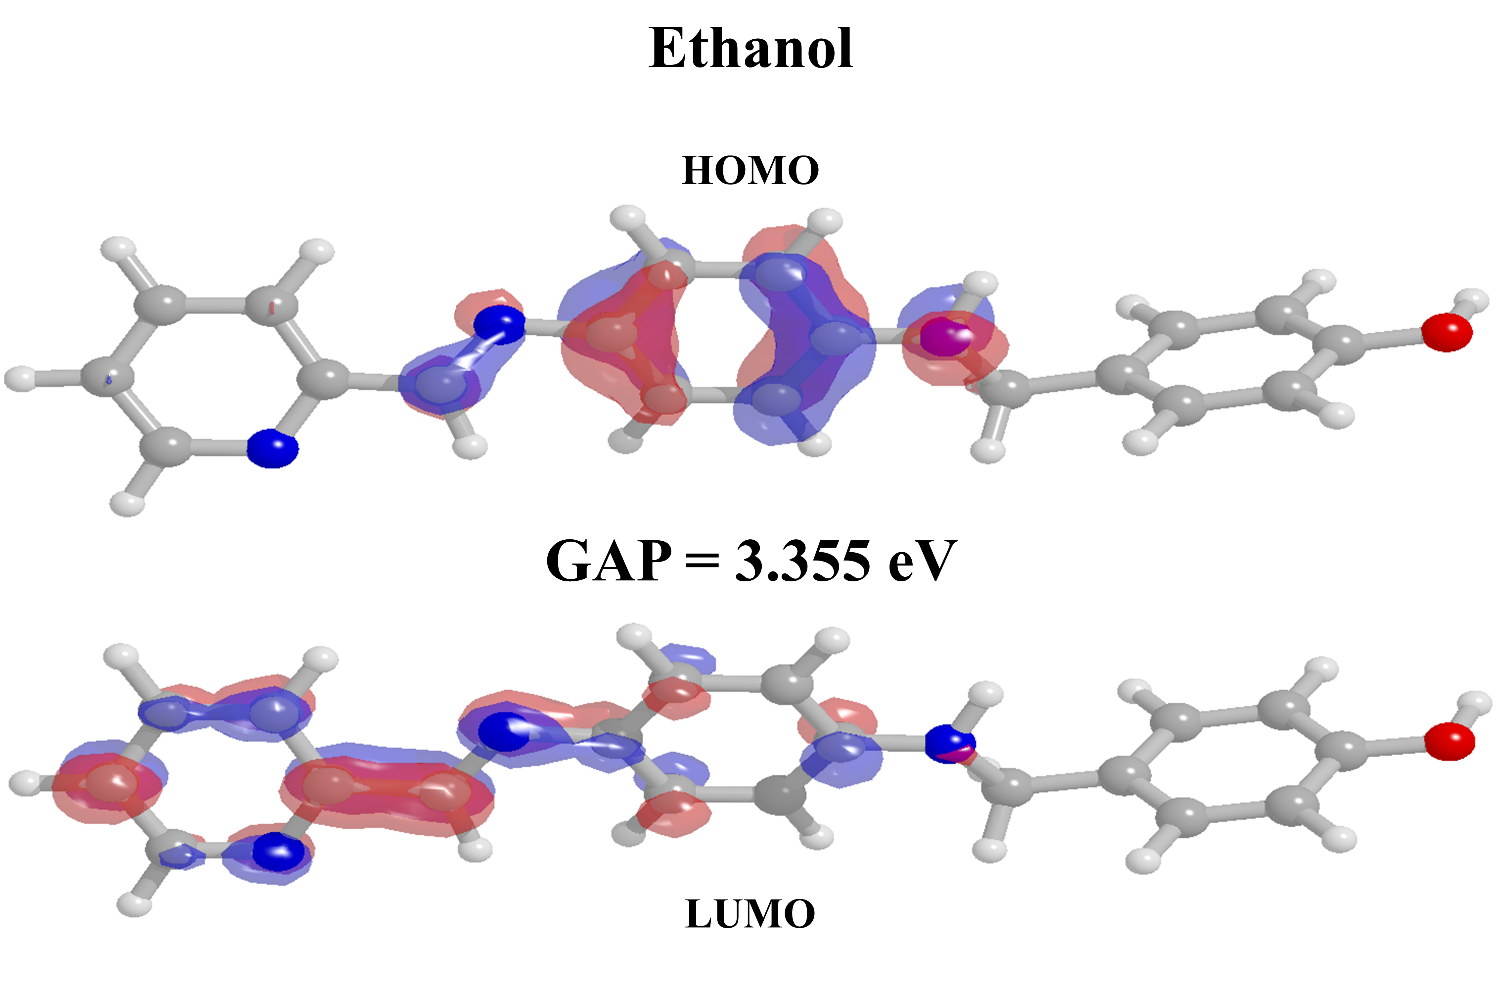


Figure S 12. HOMO and LUMO in etanol.


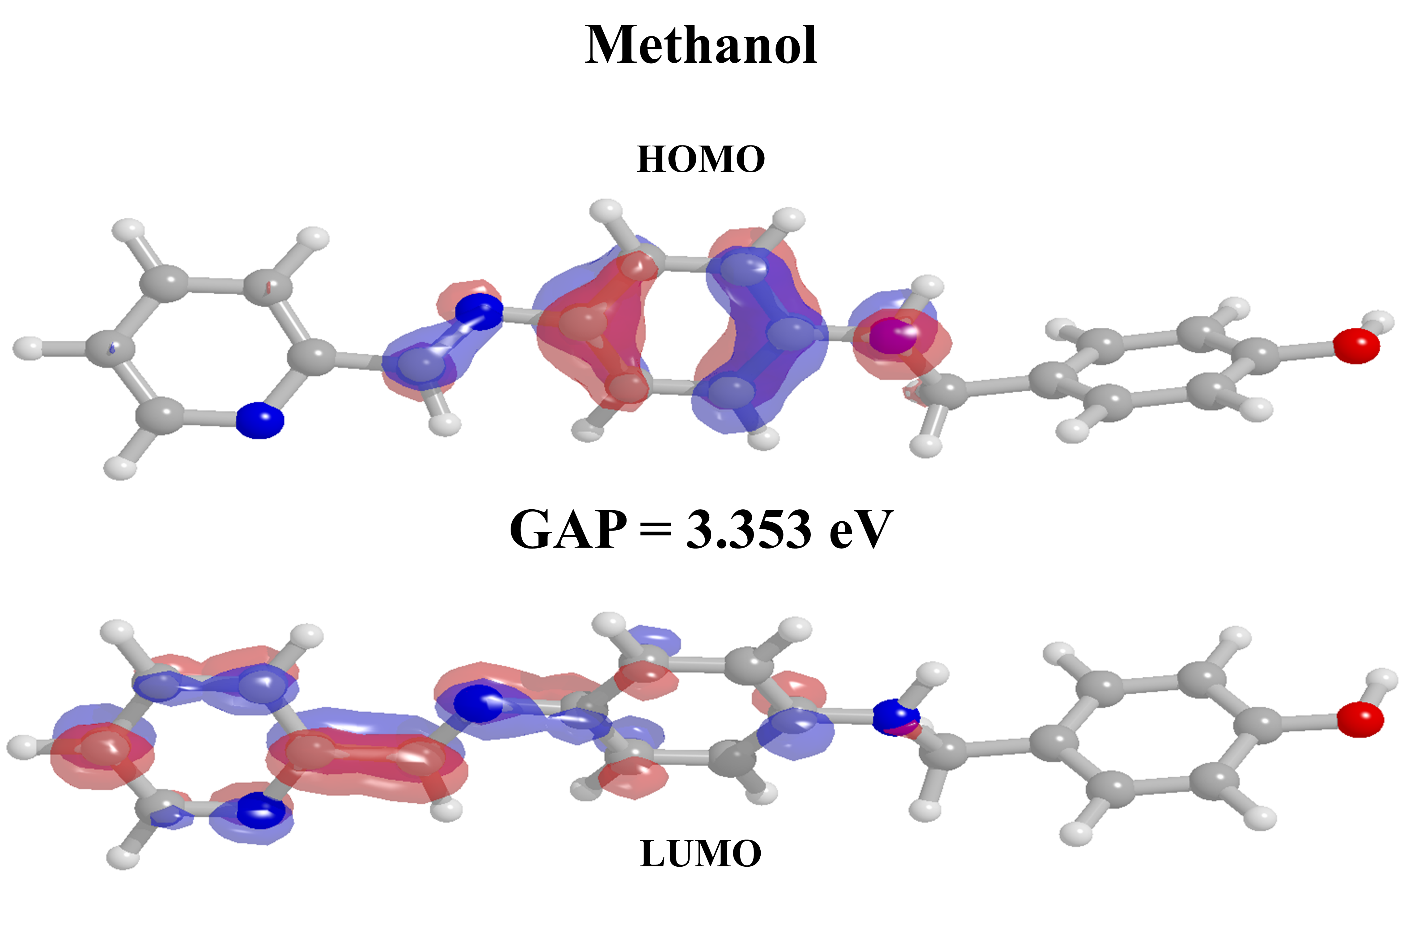


Figure S 13. HOMO and LUMO in metanol.


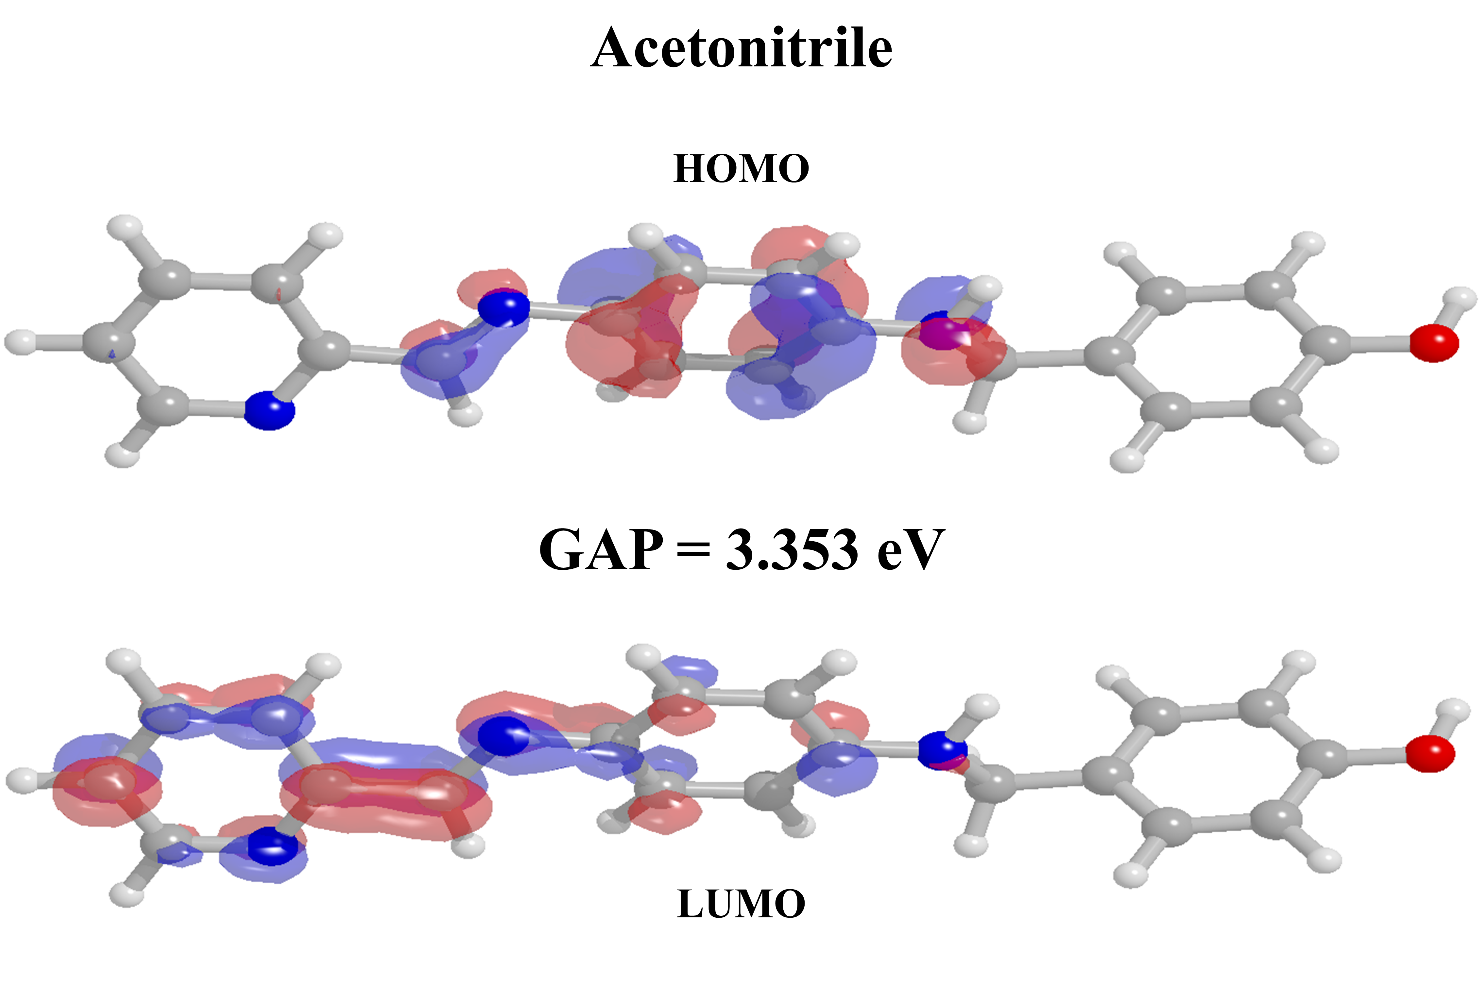


Figure S 14. HOMO and LUMO in Acetonitrile.


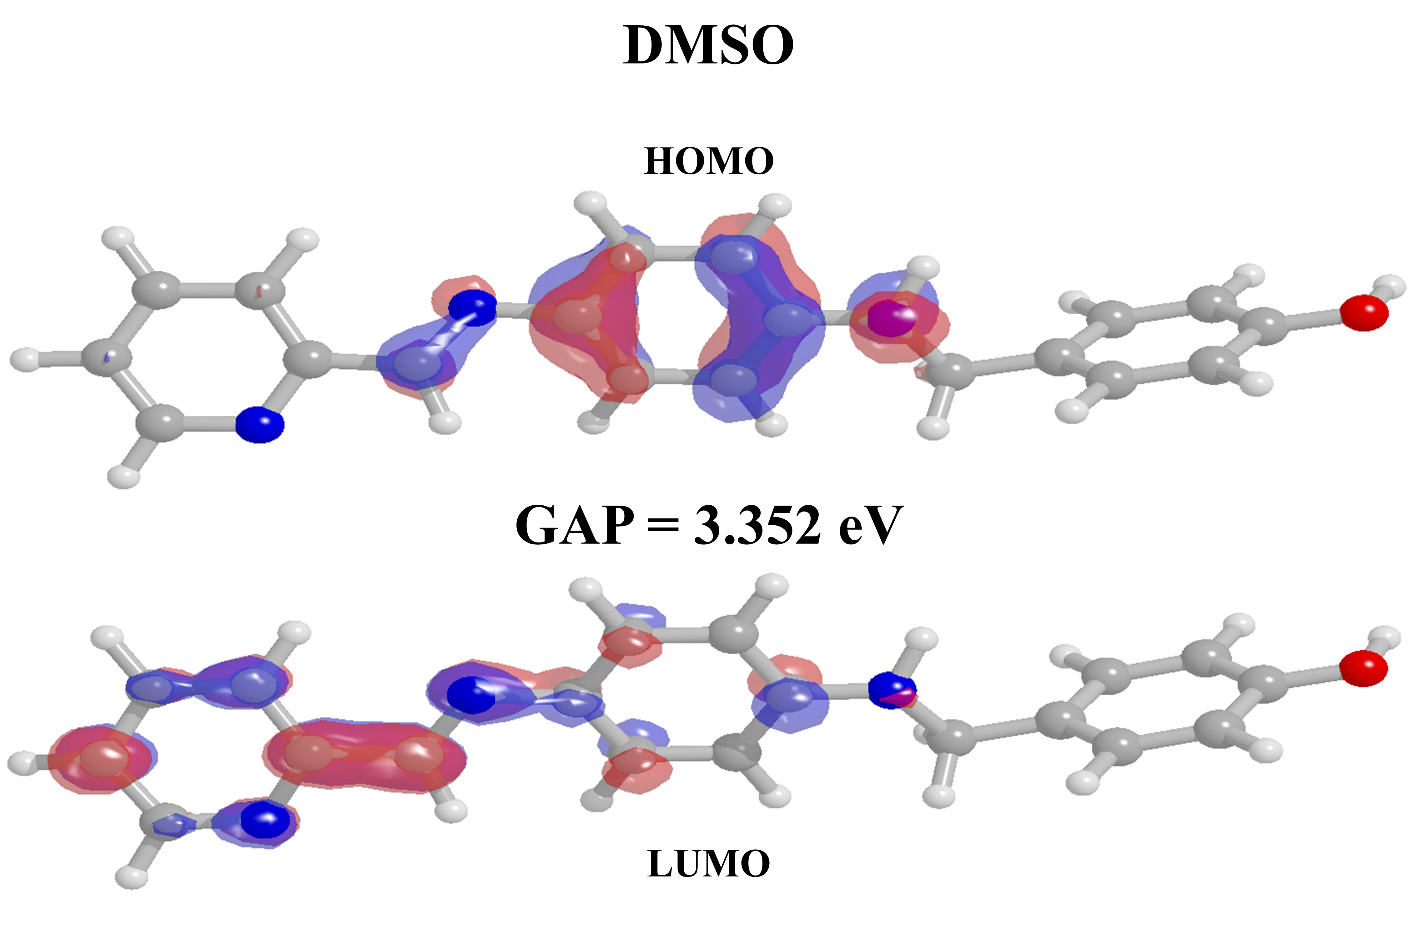


Figure S 15. HOMO and LUMO in dmso.


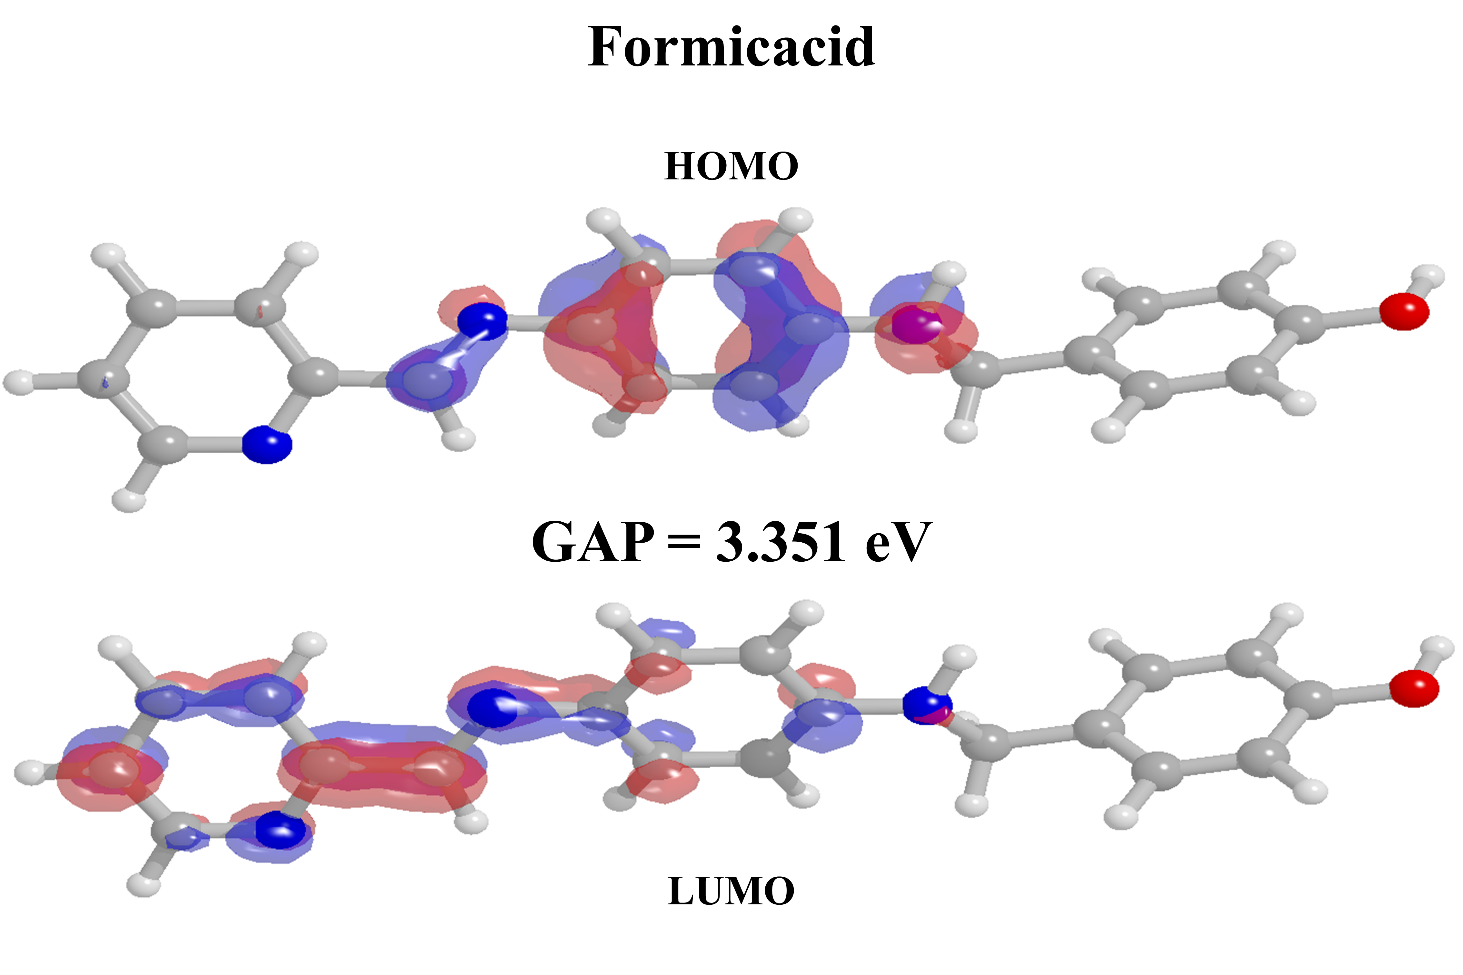


Figure S 16. HOMO and LUMO in formicacid.


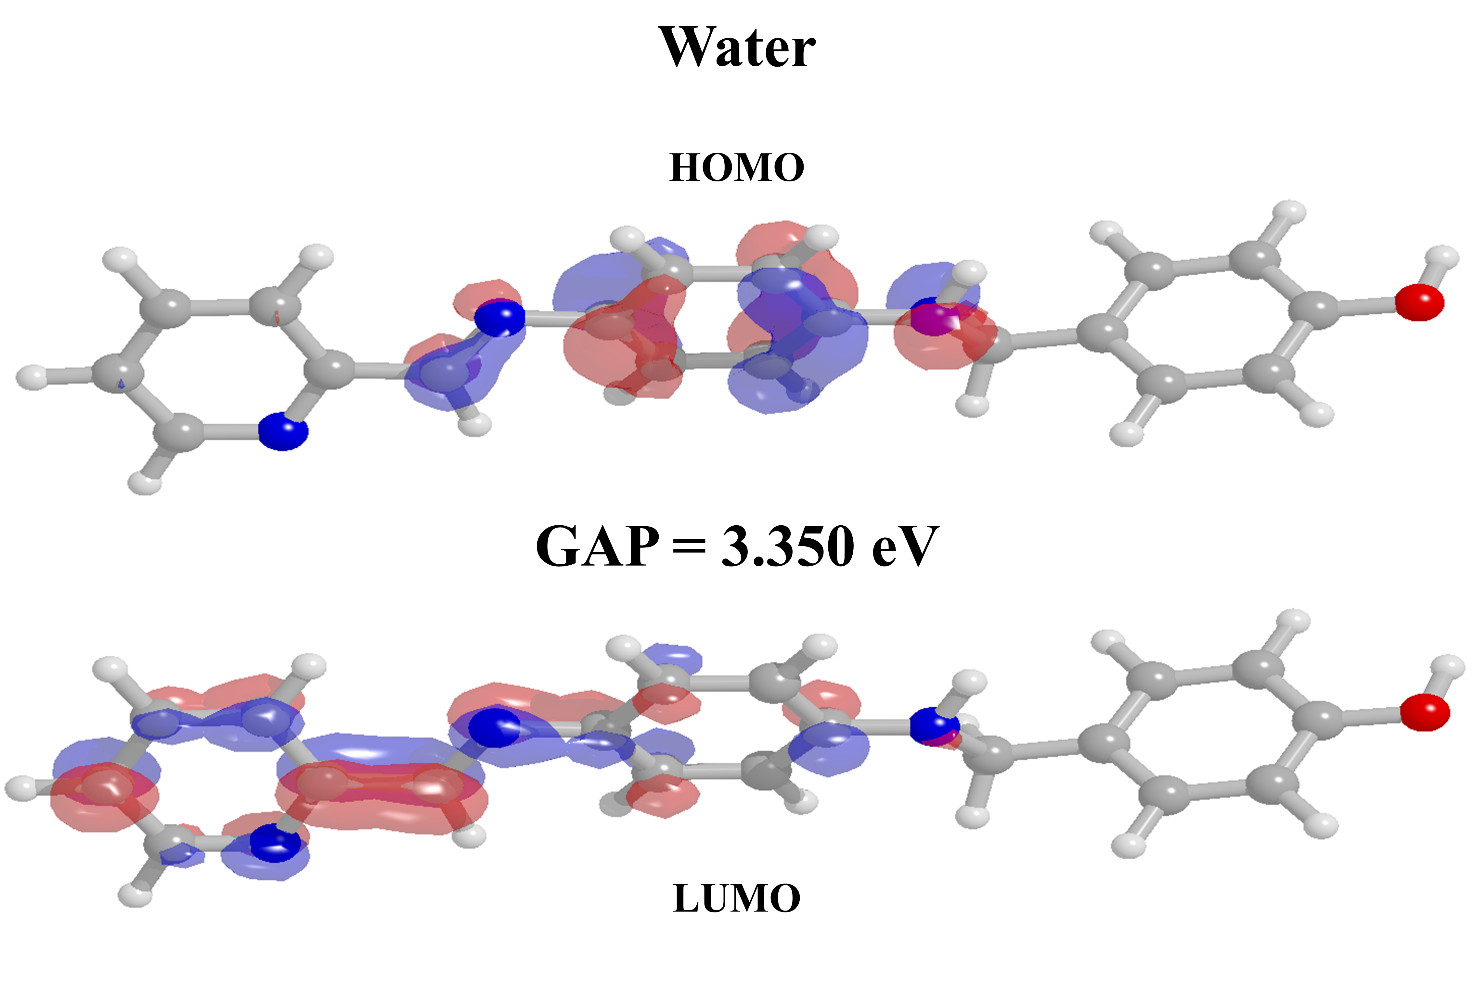


Figure S 17. HOMO and LUMO in water.


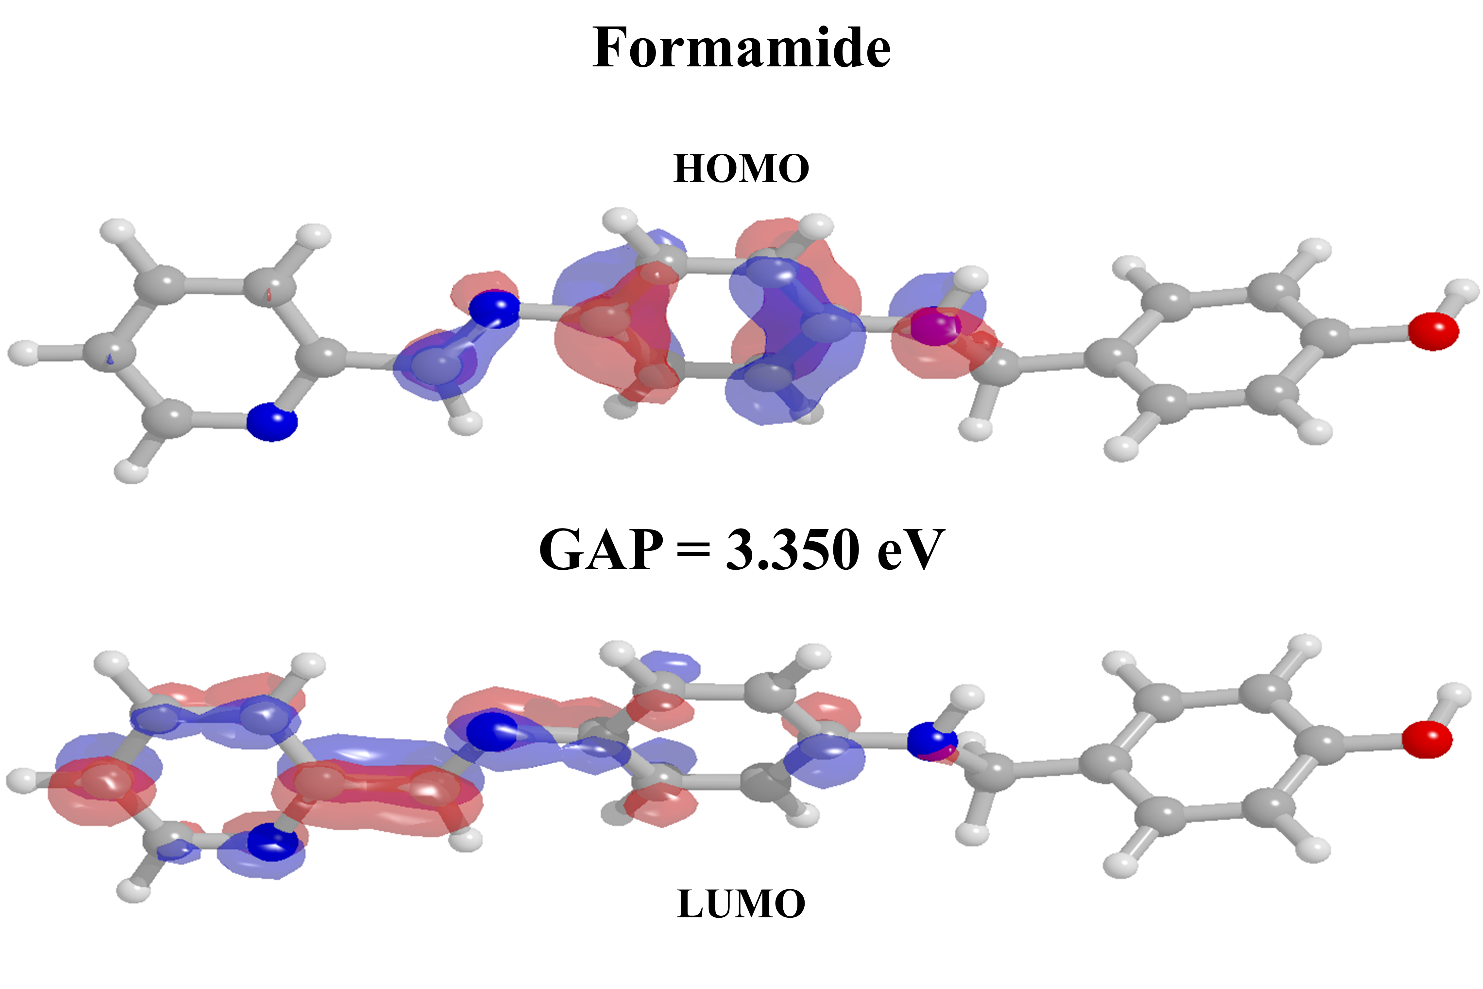


Figure S 18. HOMO and LUMO in formamide.
